# Supplementary material for: Long-term survival following postoperative myocardial infraction after coronary artery bypass surgery
Source: PubMed Central journal article supplement — J Thorac Dis. 2022 Jan;14(1):102–12. doi: 10.21037/jtd-21-1279 (PMC8828518; doi:10.21037/jtd-21-1279), 2022-01
Supplement: jtd-14-01-102-coif.pdf [file jtd-14-01-102-coif.pdf]

## ICMJE DISCLOSURE FORM

|                                      |                                                                                                        |
|--------------------------------------|--------------------------------------------------------------------------------------------------------|
| <b>Date:</b>                         | 12.10.2021                                                                                             |
| <b>Your Name:</b>                    | Radosław Litwinowicz                                                                                   |
| <b>Manuscript Title:</b>             | Long-term survival following postoperative myocardial infraction after coronary artery bypass surgery. |
| <b>Manuscript Number (if known):</b> | <b>JTD-21-1279-CL</b>                                                                                  |

In the interest of transparency, we ask you to disclose all relationships/activities/interests listed below that are related to the content of your manuscript. "Related" means any relation with for-profit or not-for-profit third parties whose interests may be affected by the content of the manuscript. Disclosure represents a commitment to transparency and does not necessarily indicate a bias. If you are in doubt about whether to list a relationship/activity/interest, it is preferable that you do so.

The author's relationships/activities/interests should be defined broadly. For example, if your manuscript pertains to the epidemiology of hypertension, you should declare all relationships with manufacturers of antihypertensive medication, even if that medication is not mentioned in the manuscript.

In item #1 below, report all support for the work reported in this manuscript without time limit. For all other items, the time frame for disclosure is the past 36 months.

|          | Name all entities with whom you have this relationship or indicate none (add rows as needed)                                                                                   | Specifications/Comments (e.g., if payments were made to you or to your institution) |                               |
|----------|--------------------------------------------------------------------------------------------------------------------------------------------------------------------------------|-------------------------------------------------------------------------------------|-------------------------------|
| <b>1</b> | All support for the present manuscript (e.g., funding, provision of study materials, medical writing, article processing charges, etc.)<br><b>No time limit for this item.</b> | <input checked="" type="checkbox"/>                                                 | <input type="checkbox"/> None |
| <b>2</b> | Grants or contracts from any entity (if not indicated in item #1 above).                                                                                                       | <input checked="" type="checkbox"/>                                                 | <input type="checkbox"/> None |

|   |                                                                                                              |   |      |
|---|--------------------------------------------------------------------------------------------------------------|---|------|
| 3 | Royalties or licenses                                                                                        | X | None |
|   |                                                                                                              |   |      |
|   |                                                                                                              |   |      |
|   |                                                                                                              |   |      |
| 4 | Consulting fees                                                                                              | X | None |
|   |                                                                                                              |   |      |
|   |                                                                                                              |   |      |
|   |                                                                                                              |   |      |
| 5 | Payment or honoraria for lectures, presentations, speakers bureaus, manuscript writing or educational events | X | None |
|   |                                                                                                              |   |      |
|   |                                                                                                              |   |      |
|   |                                                                                                              |   |      |
| 6 | Payment for expert testimony                                                                                 | X | None |
|   |                                                                                                              |   |      |
|   |                                                                                                              |   |      |
|   |                                                                                                              |   |      |
| 7 | Support for attending meetings and/or travel                                                                 | X | None |
|   |                                                                                                              |   |      |
|   |                                                                                                              |   |      |
|   |                                                                                                              |   |      |
| 8 | Patents planned, issued or pending                                                                           | X | None |
|   |                                                                                                              |   |      |
|   |                                                                                                              |   |      |
|   |                                                                                                              |   |      |
| 9 | Participation on a Data Safety Monitoring Board or Advisory Board                                            | X | None |
|   |                                                                                                              |   |      |
|   |                                                                                                              |   |      |
|   |                                                                                                              |   |      |

|                                                                                        |                                                                                                                      |                                                                                                                                                                                                                                                                                                                                                                                                            |   |      |  |  |  |  |  |  |
|----------------------------------------------------------------------------------------|----------------------------------------------------------------------------------------------------------------------|------------------------------------------------------------------------------------------------------------------------------------------------------------------------------------------------------------------------------------------------------------------------------------------------------------------------------------------------------------------------------------------------------------|---|------|--|--|--|--|--|--|
| 10                                                                                     | Leadership or fiduciary role in other board, society, committee or advocacy group, paid or unpaid                    | <table border="1"> <tr> <td data-bbox="998 195 1172 226">X</td> <td data-bbox="1172 195 1349 226">None</td> </tr> <tr> <td data-bbox="998 264 1172 296"></td> <td data-bbox="1172 264 1349 296"></td> </tr> <tr> <td data-bbox="998 296 1172 327"></td> <td data-bbox="1172 296 1349 327"></td> </tr> <tr> <td data-bbox="998 327 1172 359"></td> <td data-bbox="1172 327 1349 359"></td> </tr> </table>   | X | None |  |  |  |  |  |  |
| X                                                                                      | None                                                                                                                 |                                                                                                                                                                                                                                                                                                                                                                                                            |   |      |  |  |  |  |  |  |
|                                                                                        |                                                                                                                      |                                                                                                                                                                                                                                                                                                                                                                                                            |   |      |  |  |  |  |  |  |
|                                                                                        |                                                                                                                      |                                                                                                                                                                                                                                                                                                                                                                                                            |   |      |  |  |  |  |  |  |
|                                                                                        |                                                                                                                      |                                                                                                                                                                                                                                                                                                                                                                                                            |   |      |  |  |  |  |  |  |
| 11                                                                                     | Stock or stock options                                                                                               | <table border="1"> <tr> <td data-bbox="998 407 1172 438">X</td> <td data-bbox="1172 407 1349 438">None</td> </tr> <tr> <td data-bbox="998 476 1172 508"></td> <td data-bbox="1172 476 1349 508"></td> </tr> <tr> <td data-bbox="998 508 1172 539"></td> <td data-bbox="1172 508 1349 539"></td> </tr> <tr> <td data-bbox="998 539 1172 571"></td> <td data-bbox="1172 539 1349 571"></td> </tr> </table>   | X | None |  |  |  |  |  |  |
| X                                                                                      | None                                                                                                                 |                                                                                                                                                                                                                                                                                                                                                                                                            |   |      |  |  |  |  |  |  |
|                                                                                        |                                                                                                                      |                                                                                                                                                                                                                                                                                                                                                                                                            |   |      |  |  |  |  |  |  |
|                                                                                        |                                                                                                                      |                                                                                                                                                                                                                                                                                                                                                                                                            |   |      |  |  |  |  |  |  |
|                                                                                        |                                                                                                                      |                                                                                                                                                                                                                                                                                                                                                                                                            |   |      |  |  |  |  |  |  |
| 12                                                                                     | Receipt of equipment, materials, drugs, medical writing, gifts or other services                                     | <table border="1"> <tr> <td data-bbox="998 625 1172 657">X</td> <td data-bbox="1172 625 1349 657">None</td> </tr> <tr> <td data-bbox="998 695 1172 726"></td> <td data-bbox="1172 695 1349 726"></td> </tr> <tr> <td data-bbox="998 726 1172 758"></td> <td data-bbox="1172 726 1349 758"></td> </tr> <tr> <td data-bbox="998 758 1172 789"></td> <td data-bbox="1172 758 1349 789"></td> </tr> </table>   | X | None |  |  |  |  |  |  |
| X                                                                                      | None                                                                                                                 |                                                                                                                                                                                                                                                                                                                                                                                                            |   |      |  |  |  |  |  |  |
|                                                                                        |                                                                                                                      |                                                                                                                                                                                                                                                                                                                                                                                                            |   |      |  |  |  |  |  |  |
|                                                                                        |                                                                                                                      |                                                                                                                                                                                                                                                                                                                                                                                                            |   |      |  |  |  |  |  |  |
|                                                                                        |                                                                                                                      |                                                                                                                                                                                                                                                                                                                                                                                                            |   |      |  |  |  |  |  |  |
| 13                                                                                     | Other financial or non-financial interests                                                                           | <table border="1"> <tr> <td data-bbox="998 844 1172 875">X</td> <td data-bbox="1172 844 1349 875">None</td> </tr> <tr> <td data-bbox="998 913 1172 945"></td> <td data-bbox="1172 913 1349 945"></td> </tr> <tr> <td data-bbox="998 945 1172 976"></td> <td data-bbox="1172 945 1349 976"></td> </tr> <tr> <td data-bbox="998 976 1172 1008"></td> <td data-bbox="1172 976 1349 1008"></td> </tr> </table> | X | None |  |  |  |  |  |  |
| X                                                                                      | None                                                                                                                 |                                                                                                                                                                                                                                                                                                                                                                                                            |   |      |  |  |  |  |  |  |
|                                                                                        |                                                                                                                      |                                                                                                                                                                                                                                                                                                                                                                                                            |   |      |  |  |  |  |  |  |
|                                                                                        |                                                                                                                      |                                                                                                                                                                                                                                                                                                                                                                                                            |   |      |  |  |  |  |  |  |
|                                                                                        |                                                                                                                      |                                                                                                                                                                                                                                                                                                                                                                                                            |   |      |  |  |  |  |  |  |
| <b>Please place an "X" next to the following statement to indicate your agreement:</b> |                                                                                                                      |                                                                                                                                                                                                                                                                                                                                                                                                            |   |      |  |  |  |  |  |  |
| X                                                                                      | I certify that I have answered every question and have not altered the wording of any of the questions on this form. |                                                                                                                                                                                                                                                                                                                                                                                                            |   |      |  |  |  |  |  |  |

## ICMJE DISCLOSURE FORM

|                                                                                                                                                                                                                                                                                                                                                                                                                                                                                                                                                                                                                                                                                                                                                                                                                                                                                                                                                                                                                                        |                                                                                                        |
|----------------------------------------------------------------------------------------------------------------------------------------------------------------------------------------------------------------------------------------------------------------------------------------------------------------------------------------------------------------------------------------------------------------------------------------------------------------------------------------------------------------------------------------------------------------------------------------------------------------------------------------------------------------------------------------------------------------------------------------------------------------------------------------------------------------------------------------------------------------------------------------------------------------------------------------------------------------------------------------------------------------------------------------|--------------------------------------------------------------------------------------------------------|
| <b>Date:</b>                                                                                                                                                                                                                                                                                                                                                                                                                                                                                                                                                                                                                                                                                                                                                                                                                                                                                                                                                                                                                           | 12.10.2021                                                                                             |
| <b>Your Name:</b>                                                                                                                                                                                                                                                                                                                                                                                                                                                                                                                                                                                                                                                                                                                                                                                                                                                                                                                                                                                                                      | Piotr Mazur                                                                                            |
| <b>Manuscript Title:</b>                                                                                                                                                                                                                                                                                                                                                                                                                                                                                                                                                                                                                                                                                                                                                                                                                                                                                                                                                                                                               | Long-term survival following postoperative myocardial infraction after coronary artery bypass surgery. |
| <b>Manuscript Number (if known):</b>                                                                                                                                                                                                                                                                                                                                                                                                                                                                                                                                                                                                                                                                                                                                                                                                                                                                                                                                                                                                   | <b>JTD-21-1279-CL</b>                                                                                  |
| <p>In the interest of transparency, we ask you to disclose all relationships/activities/interests listed below that are related to the content of your manuscript. "Related" means any relation with for-profit or not-for-profit third parties whose interests may be affected by the content of the manuscript. Disclosure represents a commitment to transparency and does not necessarily indicate a bias. If you are in doubt about whether to list a relationship/activity/interest, it is preferable that you do so.</p> <p>The author's relationships/activities/interests should be defined broadly. For example, if your manuscript pertains to the epidemiology of hypertension, you should declare all relationships with manufacturers of antihypertensive medication, even if that medication is not mentioned in the manuscript.</p> <p>In item #1 below, report all support for the work reported in this manuscript without time limit. For all other items, the time frame for disclosure is the past 36 months.</p> |                                                                                                        |

|          | Name all entities with whom you have this relationship or indicate none (add rows as needed)                                                                                   | Specifications/Comments (e.g., if payments were made to you or to your institution) |                          |
|----------|--------------------------------------------------------------------------------------------------------------------------------------------------------------------------------|-------------------------------------------------------------------------------------|--------------------------|
| <b>1</b> | All support for the present manuscript (e.g., funding, provision of study materials, medical writing, article processing charges, etc.)<br><b>No time limit for this item.</b> | <input checked="" type="checkbox"/>                                                 | <input type="checkbox"/> |
|          |                                                                                                                                                                                | <input type="checkbox"/>                                                            | <input type="checkbox"/> |
|          |                                                                                                                                                                                | <input type="checkbox"/>                                                            | <input type="checkbox"/> |
| <b>2</b> | Grants or contracts from any entity (if not indicated in item #1 above).                                                                                                       | <input checked="" type="checkbox"/>                                                 | <input type="checkbox"/> |
|          |                                                                                                                                                                                | <input type="checkbox"/>                                                            | <input type="checkbox"/> |
|          |                                                                                                                                                                                | <input type="checkbox"/>                                                            | <input type="checkbox"/> |

|   |                                                                                                              |   |      |
|---|--------------------------------------------------------------------------------------------------------------|---|------|
| 3 | Royalties or licenses                                                                                        | X | None |
|   |                                                                                                              |   |      |
|   |                                                                                                              |   |      |
|   |                                                                                                              |   |      |
| 4 | Consulting fees                                                                                              | X | None |
|   |                                                                                                              |   |      |
|   |                                                                                                              |   |      |
|   |                                                                                                              |   |      |
| 5 | Payment or honoraria for lectures, presentations, speakers bureaus, manuscript writing or educational events | X | None |
|   |                                                                                                              |   |      |
|   |                                                                                                              |   |      |
|   |                                                                                                              |   |      |
| 6 | Payment for expert testimony                                                                                 | X | None |
|   |                                                                                                              |   |      |
|   |                                                                                                              |   |      |
|   |                                                                                                              |   |      |
| 7 | Support for attending meetings and/or travel                                                                 | X | None |
|   |                                                                                                              |   |      |
|   |                                                                                                              |   |      |
|   |                                                                                                              |   |      |
| 8 | Patents planned, issued or pending                                                                           | X | None |
|   |                                                                                                              |   |      |
|   |                                                                                                              |   |      |
|   |                                                                                                              |   |      |
| 9 | Participation on a Data Safety Monitoring Board or Advisory Board                                            | X | None |
|   |                                                                                                              |   |      |
|   |                                                                                                              |   |      |
|   |                                                                                                              |   |      |

|                                                                                        |                                                                                                                      |                                                                                                                                                                                                                                                                                                                                                                                                                |   |      |  |  |  |  |  |  |
|----------------------------------------------------------------------------------------|----------------------------------------------------------------------------------------------------------------------|----------------------------------------------------------------------------------------------------------------------------------------------------------------------------------------------------------------------------------------------------------------------------------------------------------------------------------------------------------------------------------------------------------------|---|------|--|--|--|--|--|--|
| 10                                                                                     | Leadership or fiduciary role in other board, society, committee or advocacy group, paid or unpaid                    | <table border="1"> <tr> <td data-bbox="1000 195 1179 226">X</td> <td data-bbox="1179 195 1343 226">None</td> </tr> <tr> <td data-bbox="1000 264 1179 296"></td> <td data-bbox="1179 264 1343 296"></td> </tr> <tr> <td data-bbox="1000 296 1179 327"></td> <td data-bbox="1179 296 1343 327"></td> </tr> <tr> <td data-bbox="1000 327 1179 359"></td> <td data-bbox="1179 327 1343 359"></td> </tr> </table>   | X | None |  |  |  |  |  |  |
| X                                                                                      | None                                                                                                                 |                                                                                                                                                                                                                                                                                                                                                                                                                |   |      |  |  |  |  |  |  |
|                                                                                        |                                                                                                                      |                                                                                                                                                                                                                                                                                                                                                                                                                |   |      |  |  |  |  |  |  |
|                                                                                        |                                                                                                                      |                                                                                                                                                                                                                                                                                                                                                                                                                |   |      |  |  |  |  |  |  |
|                                                                                        |                                                                                                                      |                                                                                                                                                                                                                                                                                                                                                                                                                |   |      |  |  |  |  |  |  |
| 11                                                                                     | Stock or stock options                                                                                               | <table border="1"> <tr> <td data-bbox="1000 407 1179 438">X</td> <td data-bbox="1179 407 1343 438">None</td> </tr> <tr> <td data-bbox="1000 476 1179 508"></td> <td data-bbox="1179 476 1343 508"></td> </tr> <tr> <td data-bbox="1000 508 1179 539"></td> <td data-bbox="1179 508 1343 539"></td> </tr> <tr> <td data-bbox="1000 539 1179 571"></td> <td data-bbox="1179 539 1343 571"></td> </tr> </table>   | X | None |  |  |  |  |  |  |
| X                                                                                      | None                                                                                                                 |                                                                                                                                                                                                                                                                                                                                                                                                                |   |      |  |  |  |  |  |  |
|                                                                                        |                                                                                                                      |                                                                                                                                                                                                                                                                                                                                                                                                                |   |      |  |  |  |  |  |  |
|                                                                                        |                                                                                                                      |                                                                                                                                                                                                                                                                                                                                                                                                                |   |      |  |  |  |  |  |  |
|                                                                                        |                                                                                                                      |                                                                                                                                                                                                                                                                                                                                                                                                                |   |      |  |  |  |  |  |  |
| 12                                                                                     | Receipt of equipment, materials, drugs, medical writing, gifts or other services                                     | <table border="1"> <tr> <td data-bbox="1000 625 1179 657">X</td> <td data-bbox="1179 625 1343 657">None</td> </tr> <tr> <td data-bbox="1000 695 1179 726"></td> <td data-bbox="1179 695 1343 726"></td> </tr> <tr> <td data-bbox="1000 726 1179 758"></td> <td data-bbox="1179 726 1343 758"></td> </tr> <tr> <td data-bbox="1000 758 1179 789"></td> <td data-bbox="1179 758 1343 789"></td> </tr> </table>   | X | None |  |  |  |  |  |  |
| X                                                                                      | None                                                                                                                 |                                                                                                                                                                                                                                                                                                                                                                                                                |   |      |  |  |  |  |  |  |
|                                                                                        |                                                                                                                      |                                                                                                                                                                                                                                                                                                                                                                                                                |   |      |  |  |  |  |  |  |
|                                                                                        |                                                                                                                      |                                                                                                                                                                                                                                                                                                                                                                                                                |   |      |  |  |  |  |  |  |
|                                                                                        |                                                                                                                      |                                                                                                                                                                                                                                                                                                                                                                                                                |   |      |  |  |  |  |  |  |
| 13                                                                                     | Other financial or non-financial interests                                                                           | <table border="1"> <tr> <td data-bbox="1000 844 1179 875">X</td> <td data-bbox="1179 844 1343 875">None</td> </tr> <tr> <td data-bbox="1000 913 1179 945"></td> <td data-bbox="1179 913 1343 945"></td> </tr> <tr> <td data-bbox="1000 945 1179 976"></td> <td data-bbox="1179 945 1343 976"></td> </tr> <tr> <td data-bbox="1000 976 1179 1008"></td> <td data-bbox="1179 976 1343 1008"></td> </tr> </table> | X | None |  |  |  |  |  |  |
| X                                                                                      | None                                                                                                                 |                                                                                                                                                                                                                                                                                                                                                                                                                |   |      |  |  |  |  |  |  |
|                                                                                        |                                                                                                                      |                                                                                                                                                                                                                                                                                                                                                                                                                |   |      |  |  |  |  |  |  |
|                                                                                        |                                                                                                                      |                                                                                                                                                                                                                                                                                                                                                                                                                |   |      |  |  |  |  |  |  |
|                                                                                        |                                                                                                                      |                                                                                                                                                                                                                                                                                                                                                                                                                |   |      |  |  |  |  |  |  |
| <b>Please place an "X" next to the following statement to indicate your agreement:</b> |                                                                                                                      |                                                                                                                                                                                                                                                                                                                                                                                                                |   |      |  |  |  |  |  |  |
| X                                                                                      | I certify that I have answered every question and have not altered the wording of any of the questions on this form. |                                                                                                                                                                                                                                                                                                                                                                                                                |   |      |  |  |  |  |  |  |

## ICMJE DISCLOSURE FORM

|                                                                                                                                                                                                                                                                                                                                                                                                                                                                                                                                                                                                                                                                                                                                                                                                                                                                                                                                                                                                                                        |                                                                                                        |
|----------------------------------------------------------------------------------------------------------------------------------------------------------------------------------------------------------------------------------------------------------------------------------------------------------------------------------------------------------------------------------------------------------------------------------------------------------------------------------------------------------------------------------------------------------------------------------------------------------------------------------------------------------------------------------------------------------------------------------------------------------------------------------------------------------------------------------------------------------------------------------------------------------------------------------------------------------------------------------------------------------------------------------------|--------------------------------------------------------------------------------------------------------|
| <b>Date:</b>                                                                                                                                                                                                                                                                                                                                                                                                                                                                                                                                                                                                                                                                                                                                                                                                                                                                                                                                                                                                                           | 12.10.2021                                                                                             |
| <b>Your Name:</b>                                                                                                                                                                                                                                                                                                                                                                                                                                                                                                                                                                                                                                                                                                                                                                                                                                                                                                                                                                                                                      | Piotr Śliwiński                                                                                        |
| <b>Manuscript Title:</b>                                                                                                                                                                                                                                                                                                                                                                                                                                                                                                                                                                                                                                                                                                                                                                                                                                                                                                                                                                                                               | Long-term survival following postoperative myocardial infraction after coronary artery bypass surgery. |
| <b>Manuscript Number (if known):</b>                                                                                                                                                                                                                                                                                                                                                                                                                                                                                                                                                                                                                                                                                                                                                                                                                                                                                                                                                                                                   | <b>JTD-21-1279-CL</b>                                                                                  |
| <p>In the interest of transparency, we ask you to disclose all relationships/activities/interests listed below that are related to the content of your manuscript. "Related" means any relation with for-profit or not-for-profit third parties whose interests may be affected by the content of the manuscript. Disclosure represents a commitment to transparency and does not necessarily indicate a bias. If you are in doubt about whether to list a relationship/activity/interest, it is preferable that you do so.</p> <p>The author's relationships/activities/interests should be defined broadly. For example, if your manuscript pertains to the epidemiology of hypertension, you should declare all relationships with manufacturers of antihypertensive medication, even if that medication is not mentioned in the manuscript.</p> <p>In item #1 below, report all support for the work reported in this manuscript without time limit. For all other items, the time frame for disclosure is the past 36 months.</p> |                                                                                                        |

|          | <b>Name all entities with whom you have this relationship or indicate none (add rows as needed)</b>                                                                            | <b>Specifications/Comments (e.g., if payments were made to you or to your institution)</b> |                               |
|----------|--------------------------------------------------------------------------------------------------------------------------------------------------------------------------------|--------------------------------------------------------------------------------------------|-------------------------------|
| <b>1</b> | All support for the present manuscript (e.g., funding, provision of study materials, medical writing, article processing charges, etc.)<br><b>No time limit for this item.</b> | <input checked="" type="checkbox"/>                                                        | <input type="checkbox"/> None |
|          |                                                                                                                                                                                | <input type="checkbox"/>                                                                   | <input type="checkbox"/>      |
|          |                                                                                                                                                                                | <input type="checkbox"/>                                                                   | <input type="checkbox"/>      |
| <b>2</b> | Grants or contracts from any entity (if not indicated in item #1 above).                                                                                                       | <input checked="" type="checkbox"/>                                                        | <input type="checkbox"/> None |
|          |                                                                                                                                                                                | <input type="checkbox"/>                                                                   | <input type="checkbox"/>      |
|          |                                                                                                                                                                                | <input type="checkbox"/>                                                                   | <input type="checkbox"/>      |

|   |                                                                                                              |   |      |
|---|--------------------------------------------------------------------------------------------------------------|---|------|
| 3 | Royalties or licenses                                                                                        | X | None |
|   |                                                                                                              |   |      |
|   |                                                                                                              |   |      |
|   |                                                                                                              |   |      |
| 4 | Consulting fees                                                                                              | X | None |
|   |                                                                                                              |   |      |
|   |                                                                                                              |   |      |
|   |                                                                                                              |   |      |
| 5 | Payment or honoraria for lectures, presentations, speakers bureaus, manuscript writing or educational events | X | None |
|   |                                                                                                              |   |      |
|   |                                                                                                              |   |      |
|   |                                                                                                              |   |      |
| 6 | Payment for expert testimony                                                                                 | X | None |
|   |                                                                                                              |   |      |
|   |                                                                                                              |   |      |
|   |                                                                                                              |   |      |
| 7 | Support for attending meetings and/or travel                                                                 | X | None |
|   |                                                                                                              |   |      |
|   |                                                                                                              |   |      |
|   |                                                                                                              |   |      |
| 8 | Patents planned, issued or pending                                                                           | X | None |
|   |                                                                                                              |   |      |
|   |                                                                                                              |   |      |
|   |                                                                                                              |   |      |
| 9 | Participation on a Data Safety Monitoring Board or Advisory Board                                            | X | None |
|   |                                                                                                              |   |      |
|   |                                                                                                              |   |      |
|   |                                                                                                              |   |      |



|                                                                                        |                                                                                                                      |                                                                                                                                                                                                                                                                                                                                                                                                            |   |      |  |  |  |  |  |  |
|----------------------------------------------------------------------------------------|----------------------------------------------------------------------------------------------------------------------|------------------------------------------------------------------------------------------------------------------------------------------------------------------------------------------------------------------------------------------------------------------------------------------------------------------------------------------------------------------------------------------------------------|---|------|--|--|--|--|--|--|
| 10                                                                                     | Leadership or fiduciary role in other board, society, committee or advocacy group, paid or unpaid                    | <table border="1"> <tr> <td data-bbox="998 195 1179 226">X</td> <td data-bbox="1179 195 1343 226">None</td> </tr> <tr> <td data-bbox="998 264 1179 296"></td> <td data-bbox="1179 264 1343 296"></td> </tr> <tr> <td data-bbox="998 296 1179 327"></td> <td data-bbox="1179 296 1343 327"></td> </tr> <tr> <td data-bbox="998 327 1179 359"></td> <td data-bbox="1179 327 1343 359"></td> </tr> </table>   | X | None |  |  |  |  |  |  |
| X                                                                                      | None                                                                                                                 |                                                                                                                                                                                                                                                                                                                                                                                                            |   |      |  |  |  |  |  |  |
|                                                                                        |                                                                                                                      |                                                                                                                                                                                                                                                                                                                                                                                                            |   |      |  |  |  |  |  |  |
|                                                                                        |                                                                                                                      |                                                                                                                                                                                                                                                                                                                                                                                                            |   |      |  |  |  |  |  |  |
|                                                                                        |                                                                                                                      |                                                                                                                                                                                                                                                                                                                                                                                                            |   |      |  |  |  |  |  |  |
| 11                                                                                     | Stock or stock options                                                                                               | <table border="1"> <tr> <td data-bbox="998 407 1179 438">X</td> <td data-bbox="1179 407 1343 438">None</td> </tr> <tr> <td data-bbox="998 476 1179 508"></td> <td data-bbox="1179 476 1343 508"></td> </tr> <tr> <td data-bbox="998 508 1179 539"></td> <td data-bbox="1179 508 1343 539"></td> </tr> <tr> <td data-bbox="998 539 1179 571"></td> <td data-bbox="1179 539 1343 571"></td> </tr> </table>   | X | None |  |  |  |  |  |  |
| X                                                                                      | None                                                                                                                 |                                                                                                                                                                                                                                                                                                                                                                                                            |   |      |  |  |  |  |  |  |
|                                                                                        |                                                                                                                      |                                                                                                                                                                                                                                                                                                                                                                                                            |   |      |  |  |  |  |  |  |
|                                                                                        |                                                                                                                      |                                                                                                                                                                                                                                                                                                                                                                                                            |   |      |  |  |  |  |  |  |
|                                                                                        |                                                                                                                      |                                                                                                                                                                                                                                                                                                                                                                                                            |   |      |  |  |  |  |  |  |
| 12                                                                                     | Receipt of equipment, materials, drugs, medical writing, gifts or other services                                     | <table border="1"> <tr> <td data-bbox="998 625 1179 657">X</td> <td data-bbox="1179 625 1343 657">None</td> </tr> <tr> <td data-bbox="998 695 1179 726"></td> <td data-bbox="1179 695 1343 726"></td> </tr> <tr> <td data-bbox="998 726 1179 758"></td> <td data-bbox="1179 726 1343 758"></td> </tr> <tr> <td data-bbox="998 758 1179 789"></td> <td data-bbox="1179 758 1343 789"></td> </tr> </table>   | X | None |  |  |  |  |  |  |
| X                                                                                      | None                                                                                                                 |                                                                                                                                                                                                                                                                                                                                                                                                            |   |      |  |  |  |  |  |  |
|                                                                                        |                                                                                                                      |                                                                                                                                                                                                                                                                                                                                                                                                            |   |      |  |  |  |  |  |  |
|                                                                                        |                                                                                                                      |                                                                                                                                                                                                                                                                                                                                                                                                            |   |      |  |  |  |  |  |  |
|                                                                                        |                                                                                                                      |                                                                                                                                                                                                                                                                                                                                                                                                            |   |      |  |  |  |  |  |  |
| 13                                                                                     | Other financial or non-financial interests                                                                           | <table border="1"> <tr> <td data-bbox="998 844 1179 875">X</td> <td data-bbox="1179 844 1343 875">None</td> </tr> <tr> <td data-bbox="998 913 1179 945"></td> <td data-bbox="1179 913 1343 945"></td> </tr> <tr> <td data-bbox="998 945 1179 976"></td> <td data-bbox="1179 945 1343 976"></td> </tr> <tr> <td data-bbox="998 976 1179 1008"></td> <td data-bbox="1179 976 1343 1008"></td> </tr> </table> | X | None |  |  |  |  |  |  |
| X                                                                                      | None                                                                                                                 |                                                                                                                                                                                                                                                                                                                                                                                                            |   |      |  |  |  |  |  |  |
|                                                                                        |                                                                                                                      |                                                                                                                                                                                                                                                                                                                                                                                                            |   |      |  |  |  |  |  |  |
|                                                                                        |                                                                                                                      |                                                                                                                                                                                                                                                                                                                                                                                                            |   |      |  |  |  |  |  |  |
|                                                                                        |                                                                                                                      |                                                                                                                                                                                                                                                                                                                                                                                                            |   |      |  |  |  |  |  |  |
| <b>Please place an "X" next to the following statement to indicate your agreement:</b> |                                                                                                                      |                                                                                                                                                                                                                                                                                                                                                                                                            |   |      |  |  |  |  |  |  |
| X                                                                                      | I certify that I have answered every question and have not altered the wording of any of the questions on this form. |                                                                                                                                                                                                                                                                                                                                                                                                            |   |      |  |  |  |  |  |  |

## ICMJE DISCLOSURE FORM

|                                                                                                                                                                                                                                                                                                                                                                                                                                                                                                                                                                                                                                                                                                                                                                                                                                                                                                                                                                                                                                        |                                                                                                        |
|----------------------------------------------------------------------------------------------------------------------------------------------------------------------------------------------------------------------------------------------------------------------------------------------------------------------------------------------------------------------------------------------------------------------------------------------------------------------------------------------------------------------------------------------------------------------------------------------------------------------------------------------------------------------------------------------------------------------------------------------------------------------------------------------------------------------------------------------------------------------------------------------------------------------------------------------------------------------------------------------------------------------------------------|--------------------------------------------------------------------------------------------------------|
| <b>Date:</b>                                                                                                                                                                                                                                                                                                                                                                                                                                                                                                                                                                                                                                                                                                                                                                                                                                                                                                                                                                                                                           | 12.10.2021                                                                                             |
| <b>Your Name:</b>                                                                                                                                                                                                                                                                                                                                                                                                                                                                                                                                                                                                                                                                                                                                                                                                                                                                                                                                                                                                                      | Magdalena Bryndza                                                                                      |
| <b>Manuscript Title:</b>                                                                                                                                                                                                                                                                                                                                                                                                                                                                                                                                                                                                                                                                                                                                                                                                                                                                                                                                                                                                               | Long-term survival following postoperative myocardial infraction after coronary artery bypass surgery. |
| <b>Manuscript Number (if known):</b>                                                                                                                                                                                                                                                                                                                                                                                                                                                                                                                                                                                                                                                                                                                                                                                                                                                                                                                                                                                                   | <b>JTD-21-1279-CL</b>                                                                                  |
| <p>In the interest of transparency, we ask you to disclose all relationships/activities/interests listed below that are related to the content of your manuscript. "Related" means any relation with for-profit or not-for-profit third parties whose interests may be affected by the content of the manuscript. Disclosure represents a commitment to transparency and does not necessarily indicate a bias. If you are in doubt about whether to list a relationship/activity/interest, it is preferable that you do so.</p> <p>The author's relationships/activities/interests should be defined broadly. For example, if your manuscript pertains to the epidemiology of hypertension, you should declare all relationships with manufacturers of antihypertensive medication, even if that medication is not mentioned in the manuscript.</p> <p>In item #1 below, report all support for the work reported in this manuscript without time limit. For all other items, the time frame for disclosure is the past 36 months.</p> |                                                                                                        |

|          | <b>Name all entities with whom you have this relationship or indicate none (add rows as needed)</b>                                                                            | <b>Specifications/Comments (e.g., if payments were made to you or to your institution)</b> |             |
|----------|--------------------------------------------------------------------------------------------------------------------------------------------------------------------------------|--------------------------------------------------------------------------------------------|-------------|
| <b>1</b> | All support for the present manuscript (e.g., funding, provision of study materials, medical writing, article processing charges, etc.)<br><b>No time limit for this item.</b> | <b>X</b>                                                                                   | <b>None</b> |
|          |                                                                                                                                                                                |                                                                                            |             |
|          |                                                                                                                                                                                |                                                                                            |             |
|          |                                                                                                                                                                                |                                                                                            |             |
| <b>2</b> | Grants or contracts from any entity (if not indicated in item #1 above).                                                                                                       | <b>X</b>                                                                                   | <b>None</b> |
|          |                                                                                                                                                                                |                                                                                            |             |
|          |                                                                                                                                                                                |                                                                                            |             |
|          |                                                                                                                                                                                |                                                                                            |             |

|   |                                                                                                              |   |      |
|---|--------------------------------------------------------------------------------------------------------------|---|------|
| 3 | Royalties or licenses                                                                                        | X | None |
|   |                                                                                                              |   |      |
|   |                                                                                                              |   |      |
|   |                                                                                                              |   |      |
| 4 | Consulting fees                                                                                              | X | None |
|   |                                                                                                              |   |      |
|   |                                                                                                              |   |      |
|   |                                                                                                              |   |      |
| 5 | Payment or honoraria for lectures, presentations, speakers bureaus, manuscript writing or educational events | X | None |
|   |                                                                                                              |   |      |
|   |                                                                                                              |   |      |
|   |                                                                                                              |   |      |
| 6 | Payment for expert testimony                                                                                 | X | None |
|   |                                                                                                              |   |      |
|   |                                                                                                              |   |      |
|   |                                                                                                              |   |      |
| 7 | Support for attending meetings and/or travel                                                                 | X | None |
|   |                                                                                                              |   |      |
|   |                                                                                                              |   |      |
|   |                                                                                                              |   |      |
| 8 | Patents planned, issued or pending                                                                           | X | None |
|   |                                                                                                              |   |      |
|   |                                                                                                              |   |      |
|   |                                                                                                              |   |      |
| 9 | Participation on a Data Safety Monitoring Board or Advisory Board                                            | X | None |
|   |                                                                                                              |   |      |
|   |                                                                                                              |   |      |
|   |                                                                                                              |   |      |

|                                                                                        |                                                                                                                      |   |      |
|----------------------------------------------------------------------------------------|----------------------------------------------------------------------------------------------------------------------|---|------|
| 10                                                                                     | Leadership or fiduciary role in other board, society, committee or advocacy group, paid or unpaid                    | X | None |
|                                                                                        |                                                                                                                      |   |      |
|                                                                                        |                                                                                                                      |   |      |
|                                                                                        |                                                                                                                      |   |      |
| 11                                                                                     | Stock or stock options                                                                                               | X | None |
|                                                                                        |                                                                                                                      |   |      |
|                                                                                        |                                                                                                                      |   |      |
|                                                                                        |                                                                                                                      |   |      |
| 12                                                                                     | Receipt of equipment, materials, drugs, medical writing, gifts or other services                                     | X | None |
|                                                                                        |                                                                                                                      |   |      |
|                                                                                        |                                                                                                                      |   |      |
|                                                                                        |                                                                                                                      |   |      |
| 13                                                                                     | Other financial or non-financial interests                                                                           | X | None |
|                                                                                        |                                                                                                                      |   |      |
|                                                                                        |                                                                                                                      |   |      |
|                                                                                        |                                                                                                                      |   |      |
| <b>Please place an "X" next to the following statement to indicate your agreement:</b> |                                                                                                                      |   |      |
| X                                                                                      | I certify that I have answered every question and have not altered the wording of any of the questions on this form. |   |      |

## ICMJE DISCLOSURE FORM

|                                                                                                                                                                                                                                                                                                                                                                                                                                                                                                                                                                                                                                                                                                                                                                                                                                                                                                                                                                                                                                        |                                                                                                        |
|----------------------------------------------------------------------------------------------------------------------------------------------------------------------------------------------------------------------------------------------------------------------------------------------------------------------------------------------------------------------------------------------------------------------------------------------------------------------------------------------------------------------------------------------------------------------------------------------------------------------------------------------------------------------------------------------------------------------------------------------------------------------------------------------------------------------------------------------------------------------------------------------------------------------------------------------------------------------------------------------------------------------------------------|--------------------------------------------------------------------------------------------------------|
| <b>Date:</b>                                                                                                                                                                                                                                                                                                                                                                                                                                                                                                                                                                                                                                                                                                                                                                                                                                                                                                                                                                                                                           | 12.10.2021                                                                                             |
| <b>Your Name:</b>                                                                                                                                                                                                                                                                                                                                                                                                                                                                                                                                                                                                                                                                                                                                                                                                                                                                                                                                                                                                                      | Krzysztof Bartuś                                                                                       |
| <b>Manuscript Title:</b>                                                                                                                                                                                                                                                                                                                                                                                                                                                                                                                                                                                                                                                                                                                                                                                                                                                                                                                                                                                                               | Long-term survival following postoperative myocardial infraction after coronary artery bypass surgery. |
| <b>Manuscript Number (if known):</b>                                                                                                                                                                                                                                                                                                                                                                                                                                                                                                                                                                                                                                                                                                                                                                                                                                                                                                                                                                                                   | <b>JTD-21-1279-CL</b>                                                                                  |
| <p>In the interest of transparency, we ask you to disclose all relationships/activities/interests listed below that are related to the content of your manuscript. "Related" means any relation with for-profit or not-for-profit third parties whose interests may be affected by the content of the manuscript. Disclosure represents a commitment to transparency and does not necessarily indicate a bias. If you are in doubt about whether to list a relationship/activity/interest, it is preferable that you do so.</p> <p>The author's relationships/activities/interests should be defined broadly. For example, if your manuscript pertains to the epidemiology of hypertension, you should declare all relationships with manufacturers of antihypertensive medication, even if that medication is not mentioned in the manuscript.</p> <p>In item #1 below, report all support for the work reported in this manuscript without time limit. For all other items, the time frame for disclosure is the past 36 months.</p> |                                                                                                        |

|          | Name all entities with whom you have this relationship or indicate none (add rows as needed)                                                                                   | Specifications/Comments (e.g., if payments were made to you or to your institution) |                          |
|----------|--------------------------------------------------------------------------------------------------------------------------------------------------------------------------------|-------------------------------------------------------------------------------------|--------------------------|
| <b>1</b> | All support for the present manuscript (e.g., funding, provision of study materials, medical writing, article processing charges, etc.)<br><b>No time limit for this item.</b> | <input checked="" type="checkbox"/>                                                 | <input type="checkbox"/> |
|          |                                                                                                                                                                                | <input type="checkbox"/>                                                            | <input type="checkbox"/> |
|          |                                                                                                                                                                                | <input type="checkbox"/>                                                            | <input type="checkbox"/> |
| <b>2</b> | Grants or contracts from any entity (if not indicated in item #1 above).                                                                                                       | <input checked="" type="checkbox"/>                                                 | <input type="checkbox"/> |
|          |                                                                                                                                                                                | <input type="checkbox"/>                                                            | <input type="checkbox"/> |
|          |                                                                                                                                                                                | <input type="checkbox"/>                                                            | <input type="checkbox"/> |

|   |                                                                                                              |   |      |
|---|--------------------------------------------------------------------------------------------------------------|---|------|
| 3 | Royalties or licenses                                                                                        | X | None |
|   |                                                                                                              |   |      |
|   |                                                                                                              |   |      |
|   |                                                                                                              |   |      |
| 4 | Consulting fees                                                                                              | X | None |
|   |                                                                                                              |   |      |
|   |                                                                                                              |   |      |
|   |                                                                                                              |   |      |
| 5 | Payment or honoraria for lectures, presentations, speakers bureaus, manuscript writing or educational events | X | None |
|   |                                                                                                              |   |      |
|   |                                                                                                              |   |      |
|   |                                                                                                              |   |      |
| 6 | Payment for expert testimony                                                                                 | X | None |
|   |                                                                                                              |   |      |
|   |                                                                                                              |   |      |
|   |                                                                                                              |   |      |
| 7 | Support for attending meetings and/or travel                                                                 | X | None |
|   |                                                                                                              |   |      |
|   |                                                                                                              |   |      |
|   |                                                                                                              |   |      |
| 8 | Patents planned, issued or pending                                                                           | X | None |
|   |                                                                                                              |   |      |
|   |                                                                                                              |   |      |
|   |                                                                                                              |   |      |
| 9 | Participation on a Data Safety Monitoring Board or Advisory Board                                            | X | None |
|   |                                                                                                              |   |      |
|   |                                                                                                              |   |      |
|   |                                                                                                              |   |      |

|                                                                                        |                                                                                                                      |   |      |
|----------------------------------------------------------------------------------------|----------------------------------------------------------------------------------------------------------------------|---|------|
| 10                                                                                     | Leadership or fiduciary role in other board, society, committee or advocacy group, paid or unpaid                    | X | None |
|                                                                                        |                                                                                                                      |   |      |
|                                                                                        |                                                                                                                      |   |      |
|                                                                                        |                                                                                                                      |   |      |
| 11                                                                                     | Stock or stock options                                                                                               | X | None |
|                                                                                        |                                                                                                                      |   |      |
|                                                                                        |                                                                                                                      |   |      |
|                                                                                        |                                                                                                                      |   |      |
| 12                                                                                     | Receipt of equipment, materials, drugs, medical writing, gifts or other services                                     | X | None |
|                                                                                        |                                                                                                                      |   |      |
|                                                                                        |                                                                                                                      |   |      |
|                                                                                        |                                                                                                                      |   |      |
| 13                                                                                     | Other financial or non-financial interests                                                                           | X | None |
|                                                                                        |                                                                                                                      |   |      |
|                                                                                        |                                                                                                                      |   |      |
|                                                                                        |                                                                                                                      |   |      |
| <b>Please place an "X" next to the following statement to indicate your agreement:</b> |                                                                                                                      |   |      |
| X                                                                                      | I certify that I have answered every question and have not altered the wording of any of the questions on this form. |   |      |

## ICMJE DISCLOSURE FORM

|                                                                                                                                                                                                                                                                                                                                                                                                                                                                                                                                                                                                                                                                                                                                                                                                                                                                                                                                                                                                                                        |                                                                                                        |
|----------------------------------------------------------------------------------------------------------------------------------------------------------------------------------------------------------------------------------------------------------------------------------------------------------------------------------------------------------------------------------------------------------------------------------------------------------------------------------------------------------------------------------------------------------------------------------------------------------------------------------------------------------------------------------------------------------------------------------------------------------------------------------------------------------------------------------------------------------------------------------------------------------------------------------------------------------------------------------------------------------------------------------------|--------------------------------------------------------------------------------------------------------|
| <b>Date:</b>                                                                                                                                                                                                                                                                                                                                                                                                                                                                                                                                                                                                                                                                                                                                                                                                                                                                                                                                                                                                                           | 12.10.2021                                                                                             |
| <b>Your Name:</b>                                                                                                                                                                                                                                                                                                                                                                                                                                                                                                                                                                                                                                                                                                                                                                                                                                                                                                                                                                                                                      | Grzegorz Filip                                                                                         |
| <b>Manuscript Title:</b>                                                                                                                                                                                                                                                                                                                                                                                                                                                                                                                                                                                                                                                                                                                                                                                                                                                                                                                                                                                                               | Long-term survival following postoperative myocardial infraction after coronary artery bypass surgery. |
| <b>Manuscript Number (if known):</b>                                                                                                                                                                                                                                                                                                                                                                                                                                                                                                                                                                                                                                                                                                                                                                                                                                                                                                                                                                                                   | <b>JTD-21-1279-CL</b>                                                                                  |
| <p>In the interest of transparency, we ask you to disclose all relationships/activities/interests listed below that are related to the content of your manuscript. "Related" means any relation with for-profit or not-for-profit third parties whose interests may be affected by the content of the manuscript. Disclosure represents a commitment to transparency and does not necessarily indicate a bias. If you are in doubt about whether to list a relationship/activity/interest, it is preferable that you do so.</p> <p>The author's relationships/activities/interests should be defined broadly. For example, if your manuscript pertains to the epidemiology of hypertension, you should declare all relationships with manufacturers of antihypertensive medication, even if that medication is not mentioned in the manuscript.</p> <p>In item #1 below, report all support for the work reported in this manuscript without time limit. For all other items, the time frame for disclosure is the past 36 months.</p> |                                                                                                        |

|          | <b>Name all entities with whom you have this relationship or indicate none (add rows as needed)</b>                                                                            | <b>Specifications/Comments (e.g., if payments were made to you or to your institution)</b> |             |
|----------|--------------------------------------------------------------------------------------------------------------------------------------------------------------------------------|--------------------------------------------------------------------------------------------|-------------|
| <b>1</b> | All support for the present manuscript (e.g., funding, provision of study materials, medical writing, article processing charges, etc.)<br><b>No time limit for this item.</b> | <b>X</b>                                                                                   | <b>None</b> |
|          |                                                                                                                                                                                |                                                                                            |             |
|          |                                                                                                                                                                                |                                                                                            |             |
|          |                                                                                                                                                                                |                                                                                            |             |
| <b>2</b> | Grants or contracts from any entity (if not indicated in item #1 above).                                                                                                       | <b>X</b>                                                                                   | <b>None</b> |
|          |                                                                                                                                                                                |                                                                                            |             |
|          |                                                                                                                                                                                |                                                                                            |             |
|          |                                                                                                                                                                                |                                                                                            |             |



|   |                                                                                                              |   |      |
|---|--------------------------------------------------------------------------------------------------------------|---|------|
| 3 | Royalties or licenses                                                                                        | X | None |
|   |                                                                                                              |   |      |
|   |                                                                                                              |   |      |
|   |                                                                                                              |   |      |
| 4 | Consulting fees                                                                                              | X | None |
|   |                                                                                                              |   |      |
|   |                                                                                                              |   |      |
|   |                                                                                                              |   |      |
| 5 | Payment or honoraria for lectures, presentations, speakers bureaus, manuscript writing or educational events | X | None |
|   |                                                                                                              |   |      |
|   |                                                                                                              |   |      |
|   |                                                                                                              |   |      |
| 6 | Payment for expert testimony                                                                                 | X | None |
|   |                                                                                                              |   |      |
|   |                                                                                                              |   |      |
|   |                                                                                                              |   |      |
| 7 | Support for attending meetings and/or travel                                                                 | X | None |
|   |                                                                                                              |   |      |
|   |                                                                                                              |   |      |
|   |                                                                                                              |   |      |
| 8 | Patents planned, issued or pending                                                                           | X | None |
|   |                                                                                                              |   |      |
|   |                                                                                                              |   |      |
|   |                                                                                                              |   |      |
| 9 | Participation on a Data Safety Monitoring Board or Advisory Board                                            | X | None |
|   |                                                                                                              |   |      |
|   |                                                                                                              |   |      |
|   |                                                                                                              |   |      |

|                                                                                        |                                                                                                                      |   |      |
|----------------------------------------------------------------------------------------|----------------------------------------------------------------------------------------------------------------------|---|------|
| 10                                                                                     | Leadership or fiduciary role in other board, society, committee or advocacy group, paid or unpaid                    | X | None |
|                                                                                        |                                                                                                                      |   |      |
|                                                                                        |                                                                                                                      |   |      |
|                                                                                        |                                                                                                                      |   |      |
| 11                                                                                     | Stock or stock options                                                                                               | X | None |
|                                                                                        |                                                                                                                      |   |      |
|                                                                                        |                                                                                                                      |   |      |
|                                                                                        |                                                                                                                      |   |      |
| 12                                                                                     | Receipt of equipment, materials, drugs, medical writing, gifts or other services                                     | X | None |
|                                                                                        |                                                                                                                      |   |      |
|                                                                                        |                                                                                                                      |   |      |
|                                                                                        |                                                                                                                      |   |      |
| 13                                                                                     | Other financial or non-financial interests                                                                           | X | None |
|                                                                                        |                                                                                                                      |   |      |
|                                                                                        |                                                                                                                      |   |      |
|                                                                                        |                                                                                                                      |   |      |
| <b>Please place an "X" next to the following statement to indicate your agreement:</b> |                                                                                                                      |   |      |
| X                                                                                      | I certify that I have answered every question and have not altered the wording of any of the questions on this form. |   |      |

## ICMJE DISCLOSURE FORM

|                                                                                                                                                                                                                                                                                                                                                                                                                                                                                                                                                                                                                                                                                                                                                                                                                                                                                                                                                                                                                                        |                                                                                                        |
|----------------------------------------------------------------------------------------------------------------------------------------------------------------------------------------------------------------------------------------------------------------------------------------------------------------------------------------------------------------------------------------------------------------------------------------------------------------------------------------------------------------------------------------------------------------------------------------------------------------------------------------------------------------------------------------------------------------------------------------------------------------------------------------------------------------------------------------------------------------------------------------------------------------------------------------------------------------------------------------------------------------------------------------|--------------------------------------------------------------------------------------------------------|
| <b>Date:</b>                                                                                                                                                                                                                                                                                                                                                                                                                                                                                                                                                                                                                                                                                                                                                                                                                                                                                                                                                                                                                           | 12.10.2021                                                                                             |
| <b>Your Name:</b>                                                                                                                                                                                                                                                                                                                                                                                                                                                                                                                                                                                                                                                                                                                                                                                                                                                                                                                                                                                                                      | Artur Bartoszcze                                                                                       |
| <b>Manuscript Title:</b>                                                                                                                                                                                                                                                                                                                                                                                                                                                                                                                                                                                                                                                                                                                                                                                                                                                                                                                                                                                                               | Long-term survival following postoperative myocardial infraction after coronary artery bypass surgery. |
| <b>Manuscript Number (if known):</b>                                                                                                                                                                                                                                                                                                                                                                                                                                                                                                                                                                                                                                                                                                                                                                                                                                                                                                                                                                                                   | <b>JTD-21-1279-CL</b>                                                                                  |
| <p>In the interest of transparency, we ask you to disclose all relationships/activities/interests listed below that are related to the content of your manuscript. "Related" means any relation with for-profit or not-for-profit third parties whose interests may be affected by the content of the manuscript. Disclosure represents a commitment to transparency and does not necessarily indicate a bias. If you are in doubt about whether to list a relationship/activity/interest, it is preferable that you do so.</p> <p>The author's relationships/activities/interests should be defined broadly. For example, if your manuscript pertains to the epidemiology of hypertension, you should declare all relationships with manufacturers of antihypertensive medication, even if that medication is not mentioned in the manuscript.</p> <p>In item #1 below, report all support for the work reported in this manuscript without time limit. For all other items, the time frame for disclosure is the past 36 months.</p> |                                                                                                        |

|          | <b>Name all entities with whom you have this relationship or indicate none (add rows as needed)</b>                                                                            | <b>Specifications/Comments (e.g., if payments were made to you or to your institution)</b> |                               |
|----------|--------------------------------------------------------------------------------------------------------------------------------------------------------------------------------|--------------------------------------------------------------------------------------------|-------------------------------|
| <b>1</b> | All support for the present manuscript (e.g., funding, provision of study materials, medical writing, article processing charges, etc.)<br><b>No time limit for this item.</b> | <input checked="" type="checkbox"/>                                                        | <input type="checkbox"/> None |
|          |                                                                                                                                                                                | <input type="checkbox"/>                                                                   | <input type="checkbox"/>      |
|          |                                                                                                                                                                                | <input type="checkbox"/>                                                                   | <input type="checkbox"/>      |
| <b>2</b> | Grants or contracts from any entity (if not indicated in item #1 above).                                                                                                       | <input checked="" type="checkbox"/>                                                        | <input type="checkbox"/> None |
|          |                                                                                                                                                                                | <input type="checkbox"/>                                                                   | <input type="checkbox"/>      |
|          |                                                                                                                                                                                | <input type="checkbox"/>                                                                   | <input type="checkbox"/>      |

|   |                                                                                                              |   |      |
|---|--------------------------------------------------------------------------------------------------------------|---|------|
| 3 | Royalties or licenses                                                                                        | X | None |
|   |                                                                                                              |   |      |
|   |                                                                                                              |   |      |
|   |                                                                                                              |   |      |
| 4 | Consulting fees                                                                                              | X | None |
|   |                                                                                                              |   |      |
|   |                                                                                                              |   |      |
|   |                                                                                                              |   |      |
| 5 | Payment or honoraria for lectures, presentations, speakers bureaus, manuscript writing or educational events | X | None |
|   |                                                                                                              |   |      |
|   |                                                                                                              |   |      |
|   |                                                                                                              |   |      |
| 6 | Payment for expert testimony                                                                                 | X | None |
|   |                                                                                                              |   |      |
|   |                                                                                                              |   |      |
|   |                                                                                                              |   |      |
| 7 | Support for attending meetings and/or travel                                                                 | X | None |
|   |                                                                                                              |   |      |
|   |                                                                                                              |   |      |
|   |                                                                                                              |   |      |
| 8 | Patents planned, issued or pending                                                                           | X | None |
|   |                                                                                                              |   |      |
|   |                                                                                                              |   |      |
|   |                                                                                                              |   |      |
| 9 | Participation on a Data Safety Monitoring Board or Advisory Board                                            | X | None |
|   |                                                                                                              |   |      |
|   |                                                                                                              |   |      |
|   |                                                                                                              |   |      |

|                                                                                        |                                                                                                                      |   |      |
|----------------------------------------------------------------------------------------|----------------------------------------------------------------------------------------------------------------------|---|------|
| 10                                                                                     | Leadership or fiduciary role in other board, society, committee or advocacy group, paid or unpaid                    | X | None |
|                                                                                        |                                                                                                                      |   |      |
|                                                                                        |                                                                                                                      |   |      |
|                                                                                        |                                                                                                                      |   |      |
| 11                                                                                     | Stock or stock options                                                                                               | X | None |
|                                                                                        |                                                                                                                      |   |      |
|                                                                                        |                                                                                                                      |   |      |
|                                                                                        |                                                                                                                      |   |      |
| 12                                                                                     | Receipt of equipment, materials, drugs, medical writing, gifts or other services                                     | X | None |
|                                                                                        |                                                                                                                      |   |      |
|                                                                                        |                                                                                                                      |   |      |
|                                                                                        |                                                                                                                      |   |      |
| 13                                                                                     | Other financial or non-financial interests                                                                           | X | None |
|                                                                                        |                                                                                                                      |   |      |
|                                                                                        |                                                                                                                      |   |      |
|                                                                                        |                                                                                                                      |   |      |
| <b>Please place an "X" next to the following statement to indicate your agreement:</b> |                                                                                                                      |   |      |
| X                                                                                      | I certify that I have answered every question and have not altered the wording of any of the questions on this form. |   |      |

## ICMJE DISCLOSURE FORM

|                                      |                                                                                                        |
|--------------------------------------|--------------------------------------------------------------------------------------------------------|
| <b>Date:</b>                         | 12.10.2021                                                                                             |
| <b>Your Name:</b>                    | Jacek Piątek                                                                                           |
| <b>Manuscript Title:</b>             | Long-term survival following postoperative myocardial infraction after coronary artery bypass surgery. |
| <b>Manuscript Number (if known):</b> | <b>JTD-21-1279-CL</b>                                                                                  |

In the interest of transparency, we ask you to disclose all relationships/activities/interests listed below that are related to the content of your manuscript. "Related" means any relation with for-profit or not-for-profit third parties whose interests may be affected by the content of the manuscript. Disclosure represents a commitment to transparency and does not necessarily indicate a bias. If you are in doubt about whether to list a relationship/activity/interest, it is preferable that you do so.

The author's relationships/activities/interests should be defined broadly. For example, if your manuscript pertains to the epidemiology of hypertension, you should declare all relationships with manufacturers of antihypertensive medication, even if that medication is not mentioned in the manuscript.

In item #1 below, report all support for the work reported in this manuscript without time limit. For all other items, the time frame for disclosure is the past 36 months.

|          | Name all entities with whom you have this relationship or indicate none (add rows as needed)                                                                                   | Specifications/Comments (e.g., if payments were made to you or to your institution) |                               |
|----------|--------------------------------------------------------------------------------------------------------------------------------------------------------------------------------|-------------------------------------------------------------------------------------|-------------------------------|
| <b>1</b> | All support for the present manuscript (e.g., funding, provision of study materials, medical writing, article processing charges, etc.)<br><b>No time limit for this item.</b> | <input checked="" type="checkbox"/> X                                               | <input type="checkbox"/> None |
|          |                                                                                                                                                                                | <input type="checkbox"/>                                                            | <input type="checkbox"/>      |
|          |                                                                                                                                                                                | <input type="checkbox"/>                                                            | <input type="checkbox"/>      |
|          |                                                                                                                                                                                | <input type="checkbox"/>                                                            | <input type="checkbox"/>      |
| <b>2</b> | Grants or contracts from any entity (if not indicated in item #1 above).                                                                                                       | <input checked="" type="checkbox"/> X                                               | <input type="checkbox"/> None |
|          |                                                                                                                                                                                | <input type="checkbox"/>                                                            | <input type="checkbox"/>      |
|          |                                                                                                                                                                                | <input type="checkbox"/>                                                            | <input type="checkbox"/>      |
|          |                                                                                                                                                                                | <input type="checkbox"/>                                                            | <input type="checkbox"/>      |

|   |                                                                                                              |   |      |
|---|--------------------------------------------------------------------------------------------------------------|---|------|
| 3 | Royalties or licenses                                                                                        | X | None |
|   |                                                                                                              |   |      |
|   |                                                                                                              |   |      |
|   |                                                                                                              |   |      |
| 4 | Consulting fees                                                                                              | X | None |
|   |                                                                                                              |   |      |
|   |                                                                                                              |   |      |
|   |                                                                                                              |   |      |
| 5 | Payment or honoraria for lectures, presentations, speakers bureaus, manuscript writing or educational events | X | None |
|   |                                                                                                              |   |      |
|   |                                                                                                              |   |      |
|   |                                                                                                              |   |      |
| 6 | Payment for expert testimony                                                                                 | X | None |
|   |                                                                                                              |   |      |
|   |                                                                                                              |   |      |
|   |                                                                                                              |   |      |
| 7 | Support for attending meetings and/or travel                                                                 | X | None |
|   |                                                                                                              |   |      |
|   |                                                                                                              |   |      |
|   |                                                                                                              |   |      |
| 8 | Patents planned, issued or pending                                                                           | X | None |
|   |                                                                                                              |   |      |
|   |                                                                                                              |   |      |
|   |                                                                                                              |   |      |
| 9 | Participation on a Data Safety Monitoring Board or Advisory Board                                            | X | None |
|   |                                                                                                              |   |      |
|   |                                                                                                              |   |      |
|   |                                                                                                              |   |      |

|                                                                                        |                                                                                                                      |   |      |
|----------------------------------------------------------------------------------------|----------------------------------------------------------------------------------------------------------------------|---|------|
| 10                                                                                     | Leadership or fiduciary role in other board, society, committee or advocacy group, paid or unpaid                    | X | None |
|                                                                                        |                                                                                                                      |   |      |
|                                                                                        |                                                                                                                      |   |      |
|                                                                                        |                                                                                                                      |   |      |
| 11                                                                                     | Stock or stock options                                                                                               | X | None |
|                                                                                        |                                                                                                                      |   |      |
|                                                                                        |                                                                                                                      |   |      |
|                                                                                        |                                                                                                                      |   |      |
| 12                                                                                     | Receipt of equipment, materials, drugs, medical writing, gifts or other services                                     | X | None |
|                                                                                        |                                                                                                                      |   |      |
|                                                                                        |                                                                                                                      |   |      |
|                                                                                        |                                                                                                                      |   |      |
| 13                                                                                     | Other financial or non-financial interests                                                                           | X | None |
|                                                                                        |                                                                                                                      |   |      |
|                                                                                        |                                                                                                                      |   |      |
|                                                                                        |                                                                                                                      |   |      |
| <b>Please place an "X" next to the following statement to indicate your agreement:</b> |                                                                                                                      |   |      |
| X                                                                                      | I certify that I have answered every question and have not altered the wording of any of the questions on this form. |   |      |



## ICMJE DISCLOSURE FORM

|                                                                                                                                                                                                                                                                                                                                                                                                                                                                                                                                                                                                                                                                                                                                                                                                                                                                                                                                                                                                                                        |                                                                                                        |
|----------------------------------------------------------------------------------------------------------------------------------------------------------------------------------------------------------------------------------------------------------------------------------------------------------------------------------------------------------------------------------------------------------------------------------------------------------------------------------------------------------------------------------------------------------------------------------------------------------------------------------------------------------------------------------------------------------------------------------------------------------------------------------------------------------------------------------------------------------------------------------------------------------------------------------------------------------------------------------------------------------------------------------------|--------------------------------------------------------------------------------------------------------|
| <b>Date:</b>                                                                                                                                                                                                                                                                                                                                                                                                                                                                                                                                                                                                                                                                                                                                                                                                                                                                                                                                                                                                                           | 12.10.2021                                                                                             |
| <b>Your Name:</b>                                                                                                                                                                                                                                                                                                                                                                                                                                                                                                                                                                                                                                                                                                                                                                                                                                                                                                                                                                                                                      | Janusz Konstanty-Kalandyk                                                                              |
| <b>Manuscript Title:</b>                                                                                                                                                                                                                                                                                                                                                                                                                                                                                                                                                                                                                                                                                                                                                                                                                                                                                                                                                                                                               | Long-term survival following postoperative myocardial infraction after coronary artery bypass surgery. |
| <b>Manuscript Number (if known):</b>                                                                                                                                                                                                                                                                                                                                                                                                                                                                                                                                                                                                                                                                                                                                                                                                                                                                                                                                                                                                   | <b>JTD-21-1279-CL</b>                                                                                  |
| <p>In the interest of transparency, we ask you to disclose all relationships/activities/interests listed below that are related to the content of your manuscript. "Related" means any relation with for-profit or not-for-profit third parties whose interests may be affected by the content of the manuscript. Disclosure represents a commitment to transparency and does not necessarily indicate a bias. If you are in doubt about whether to list a relationship/activity/interest, it is preferable that you do so.</p> <p>The author's relationships/activities/interests should be defined broadly. For example, if your manuscript pertains to the epidemiology of hypertension, you should declare all relationships with manufacturers of antihypertensive medication, even if that medication is not mentioned in the manuscript.</p> <p>In item #1 below, report all support for the work reported in this manuscript without time limit. For all other items, the time frame for disclosure is the past 36 months.</p> |                                                                                                        |

|          | Name all entities with whom you have this relationship or indicate none (add rows as needed)                                                                                   | Specifications/Comments (e.g., if payments were made to you or to your institution) |                               |
|----------|--------------------------------------------------------------------------------------------------------------------------------------------------------------------------------|-------------------------------------------------------------------------------------|-------------------------------|
| <b>1</b> | All support for the present manuscript (e.g., funding, provision of study materials, medical writing, article processing charges, etc.)<br><b>No time limit for this item.</b> | <input checked="" type="checkbox"/>                                                 | <input type="checkbox"/> None |
|          |                                                                                                                                                                                | <input type="checkbox"/>                                                            | <input type="checkbox"/>      |
|          |                                                                                                                                                                                | <input type="checkbox"/>                                                            | <input type="checkbox"/>      |
| <b>2</b> | Grants or contracts from any entity (if not indicated in item #1 above).                                                                                                       | <input checked="" type="checkbox"/>                                                 | <input type="checkbox"/> None |
|          |                                                                                                                                                                                | <input type="checkbox"/>                                                            | <input type="checkbox"/>      |
|          |                                                                                                                                                                                | <input type="checkbox"/>                                                            | <input type="checkbox"/>      |

|   |                                                                                                              |   |      |
|---|--------------------------------------------------------------------------------------------------------------|---|------|
| 3 | Royalties or licenses                                                                                        | X | None |
|   |                                                                                                              |   |      |
|   |                                                                                                              |   |      |
|   |                                                                                                              |   |      |
| 4 | Consulting fees                                                                                              | X | None |
|   |                                                                                                              |   |      |
|   |                                                                                                              |   |      |
|   |                                                                                                              |   |      |
| 5 | Payment or honoraria for lectures, presentations, speakers bureaus, manuscript writing or educational events | X | None |
|   |                                                                                                              |   |      |
|   |                                                                                                              |   |      |
|   |                                                                                                              |   |      |
| 6 | Payment for expert testimony                                                                                 | X | None |
|   |                                                                                                              |   |      |
|   |                                                                                                              |   |      |
|   |                                                                                                              |   |      |
| 7 | Support for attending meetings and/or travel                                                                 | X | None |
|   |                                                                                                              |   |      |
|   |                                                                                                              |   |      |
|   |                                                                                                              |   |      |
| 8 | Patents planned, issued or pending                                                                           | X | None |
|   |                                                                                                              |   |      |
|   |                                                                                                              |   |      |
|   |                                                                                                              |   |      |
| 9 | Participation on a Data Safety Monitoring Board or Advisory Board                                            | X | None |
|   |                                                                                                              |   |      |
|   |                                                                                                              |   |      |
|   |                                                                                                              |   |      |

|                                                                                        |                                                                                                                      |   |      |
|----------------------------------------------------------------------------------------|----------------------------------------------------------------------------------------------------------------------|---|------|
| 10                                                                                     | Leadership or fiduciary role in other board, society, committee or advocacy group, paid or unpaid                    | X | None |
|                                                                                        |                                                                                                                      |   |      |
|                                                                                        |                                                                                                                      |   |      |
|                                                                                        |                                                                                                                      |   |      |
| 11                                                                                     | Stock or stock options                                                                                               | X | None |
|                                                                                        |                                                                                                                      |   |      |
|                                                                                        |                                                                                                                      |   |      |
|                                                                                        |                                                                                                                      |   |      |
| 12                                                                                     | Receipt of equipment, materials, drugs, medical writing, gifts or other services                                     | X | None |
|                                                                                        |                                                                                                                      |   |      |
|                                                                                        |                                                                                                                      |   |      |
|                                                                                        |                                                                                                                      |   |      |
| 13                                                                                     | Other financial or non-financial interests                                                                           | X | None |
|                                                                                        |                                                                                                                      |   |      |
|                                                                                        |                                                                                                                      |   |      |
|                                                                                        |                                                                                                                      |   |      |
| <b>Please place an "X" next to the following statement to indicate your agreement:</b> |                                                                                                                      |   |      |
| X                                                                                      | I certify that I have answered every question and have not altered the wording of any of the questions on this form. |   |      |

## ICMJE DISCLOSURE FORM

|                                                                                                                                                                                                                                                                                                                                                                                                                                                                                                                                                                                                                                                                                                                                                                                                                                                                                                                                                                                                                                        |                                                                                                        |
|----------------------------------------------------------------------------------------------------------------------------------------------------------------------------------------------------------------------------------------------------------------------------------------------------------------------------------------------------------------------------------------------------------------------------------------------------------------------------------------------------------------------------------------------------------------------------------------------------------------------------------------------------------------------------------------------------------------------------------------------------------------------------------------------------------------------------------------------------------------------------------------------------------------------------------------------------------------------------------------------------------------------------------------|--------------------------------------------------------------------------------------------------------|
| <b>Date:</b>                                                                                                                                                                                                                                                                                                                                                                                                                                                                                                                                                                                                                                                                                                                                                                                                                                                                                                                                                                                                                           | 12.10.2021                                                                                             |
| <b>Your Name:</b>                                                                                                                                                                                                                                                                                                                                                                                                                                                                                                                                                                                                                                                                                                                                                                                                                                                                                                                                                                                                                      | Mariusz Kowalewski                                                                                     |
| <b>Manuscript Title:</b>                                                                                                                                                                                                                                                                                                                                                                                                                                                                                                                                                                                                                                                                                                                                                                                                                                                                                                                                                                                                               | Long-term survival following postoperative myocardial infraction after coronary artery bypass surgery. |
| <b>Manuscript Number (if known):</b>                                                                                                                                                                                                                                                                                                                                                                                                                                                                                                                                                                                                                                                                                                                                                                                                                                                                                                                                                                                                   | <b>JTD-21-1279-CL</b>                                                                                  |
| <p>In the interest of transparency, we ask you to disclose all relationships/activities/interests listed below that are related to the content of your manuscript. "Related" means any relation with for-profit or not-for-profit third parties whose interests may be affected by the content of the manuscript. Disclosure represents a commitment to transparency and does not necessarily indicate a bias. If you are in doubt about whether to list a relationship/activity/interest, it is preferable that you do so.</p> <p>The author's relationships/activities/interests should be defined broadly. For example, if your manuscript pertains to the epidemiology of hypertension, you should declare all relationships with manufacturers of antihypertensive medication, even if that medication is not mentioned in the manuscript.</p> <p>In item #1 below, report all support for the work reported in this manuscript without time limit. For all other items, the time frame for disclosure is the past 36 months.</p> |                                                                                                        |

|          | <b>Name all entities with whom you have this relationship or indicate none (add rows as needed)</b>                                                                            | <b>Specifications/Comments (e.g., if payments were made to you or to your institution)</b> |                               |
|----------|--------------------------------------------------------------------------------------------------------------------------------------------------------------------------------|--------------------------------------------------------------------------------------------|-------------------------------|
| <b>1</b> | All support for the present manuscript (e.g., funding, provision of study materials, medical writing, article processing charges, etc.)<br><b>No time limit for this item.</b> | <input checked="" type="checkbox"/>                                                        | <input type="checkbox"/> None |
|          |                                                                                                                                                                                | <input type="checkbox"/>                                                                   | <input type="checkbox"/>      |
|          |                                                                                                                                                                                | <input type="checkbox"/>                                                                   | <input type="checkbox"/>      |
| <b>2</b> | Grants or contracts from any entity (if not indicated in item #1 above).                                                                                                       | <input checked="" type="checkbox"/>                                                        | <input type="checkbox"/> None |
|          |                                                                                                                                                                                | <input type="checkbox"/>                                                                   | <input type="checkbox"/>      |
|          |                                                                                                                                                                                | <input type="checkbox"/>                                                                   | <input type="checkbox"/>      |

|   |                                                                                                              |   |      |
|---|--------------------------------------------------------------------------------------------------------------|---|------|
| 3 | Royalties or licenses                                                                                        | X | None |
|   |                                                                                                              |   |      |
|   |                                                                                                              |   |      |
|   |                                                                                                              |   |      |
| 4 | Consulting fees                                                                                              | X | None |
|   |                                                                                                              |   |      |
|   |                                                                                                              |   |      |
|   |                                                                                                              |   |      |
| 5 | Payment or honoraria for lectures, presentations, speakers bureaus, manuscript writing or educational events | X | None |
|   |                                                                                                              |   |      |
|   |                                                                                                              |   |      |
|   |                                                                                                              |   |      |
| 6 | Payment for expert testimony                                                                                 | X | None |
|   |                                                                                                              |   |      |
|   |                                                                                                              |   |      |
|   |                                                                                                              |   |      |
| 7 | Support for attending meetings and/or travel                                                                 | X | None |
|   |                                                                                                              |   |      |
|   |                                                                                                              |   |      |
|   |                                                                                                              |   |      |
| 8 | Patents planned, issued or pending                                                                           | X | None |
|   |                                                                                                              |   |      |
|   |                                                                                                              |   |      |
|   |                                                                                                              |   |      |
| 9 | Participation on a Data Safety Monitoring Board or Advisory Board                                            | X | None |
|   |                                                                                                              |   |      |
|   |                                                                                                              |   |      |
|   |                                                                                                              |   |      |

|                                                                                        |                                                                                                                      |                                                                                                                                                                                                                                                                                                                                                                                                                |   |      |  |  |  |  |  |  |
|----------------------------------------------------------------------------------------|----------------------------------------------------------------------------------------------------------------------|----------------------------------------------------------------------------------------------------------------------------------------------------------------------------------------------------------------------------------------------------------------------------------------------------------------------------------------------------------------------------------------------------------------|---|------|--|--|--|--|--|--|
| 10                                                                                     | Leadership or fiduciary role in other board, society, committee or advocacy group, paid or unpaid                    | <table border="1"> <tr> <td data-bbox="1000 195 1179 226">X</td> <td data-bbox="1179 195 1343 226">None</td> </tr> <tr> <td data-bbox="1000 264 1179 296"></td> <td data-bbox="1179 264 1343 296"></td> </tr> <tr> <td data-bbox="1000 296 1179 327"></td> <td data-bbox="1179 296 1343 327"></td> </tr> <tr> <td data-bbox="1000 327 1179 359"></td> <td data-bbox="1179 327 1343 359"></td> </tr> </table>   | X | None |  |  |  |  |  |  |
| X                                                                                      | None                                                                                                                 |                                                                                                                                                                                                                                                                                                                                                                                                                |   |      |  |  |  |  |  |  |
|                                                                                        |                                                                                                                      |                                                                                                                                                                                                                                                                                                                                                                                                                |   |      |  |  |  |  |  |  |
|                                                                                        |                                                                                                                      |                                                                                                                                                                                                                                                                                                                                                                                                                |   |      |  |  |  |  |  |  |
|                                                                                        |                                                                                                                      |                                                                                                                                                                                                                                                                                                                                                                                                                |   |      |  |  |  |  |  |  |
| 11                                                                                     | Stock or stock options                                                                                               | <table border="1"> <tr> <td data-bbox="1000 407 1179 438">X</td> <td data-bbox="1179 407 1343 438">None</td> </tr> <tr> <td data-bbox="1000 476 1179 508"></td> <td data-bbox="1179 476 1343 508"></td> </tr> <tr> <td data-bbox="1000 508 1179 539"></td> <td data-bbox="1179 508 1343 539"></td> </tr> <tr> <td data-bbox="1000 539 1179 571"></td> <td data-bbox="1179 539 1343 571"></td> </tr> </table>   | X | None |  |  |  |  |  |  |
| X                                                                                      | None                                                                                                                 |                                                                                                                                                                                                                                                                                                                                                                                                                |   |      |  |  |  |  |  |  |
|                                                                                        |                                                                                                                      |                                                                                                                                                                                                                                                                                                                                                                                                                |   |      |  |  |  |  |  |  |
|                                                                                        |                                                                                                                      |                                                                                                                                                                                                                                                                                                                                                                                                                |   |      |  |  |  |  |  |  |
|                                                                                        |                                                                                                                      |                                                                                                                                                                                                                                                                                                                                                                                                                |   |      |  |  |  |  |  |  |
| 12                                                                                     | Receipt of equipment, materials, drugs, medical writing, gifts or other services                                     | <table border="1"> <tr> <td data-bbox="1000 625 1179 657">X</td> <td data-bbox="1179 625 1343 657">None</td> </tr> <tr> <td data-bbox="1000 695 1179 726"></td> <td data-bbox="1179 695 1343 726"></td> </tr> <tr> <td data-bbox="1000 726 1179 758"></td> <td data-bbox="1179 726 1343 758"></td> </tr> <tr> <td data-bbox="1000 758 1179 789"></td> <td data-bbox="1179 758 1343 789"></td> </tr> </table>   | X | None |  |  |  |  |  |  |
| X                                                                                      | None                                                                                                                 |                                                                                                                                                                                                                                                                                                                                                                                                                |   |      |  |  |  |  |  |  |
|                                                                                        |                                                                                                                      |                                                                                                                                                                                                                                                                                                                                                                                                                |   |      |  |  |  |  |  |  |
|                                                                                        |                                                                                                                      |                                                                                                                                                                                                                                                                                                                                                                                                                |   |      |  |  |  |  |  |  |
|                                                                                        |                                                                                                                      |                                                                                                                                                                                                                                                                                                                                                                                                                |   |      |  |  |  |  |  |  |
| 13                                                                                     | Other financial or non-financial interests                                                                           | <table border="1"> <tr> <td data-bbox="1000 844 1179 875">X</td> <td data-bbox="1179 844 1343 875">None</td> </tr> <tr> <td data-bbox="1000 913 1179 945"></td> <td data-bbox="1179 913 1343 945"></td> </tr> <tr> <td data-bbox="1000 945 1179 976"></td> <td data-bbox="1179 945 1343 976"></td> </tr> <tr> <td data-bbox="1000 976 1179 1008"></td> <td data-bbox="1179 976 1343 1008"></td> </tr> </table> | X | None |  |  |  |  |  |  |
| X                                                                                      | None                                                                                                                 |                                                                                                                                                                                                                                                                                                                                                                                                                |   |      |  |  |  |  |  |  |
|                                                                                        |                                                                                                                      |                                                                                                                                                                                                                                                                                                                                                                                                                |   |      |  |  |  |  |  |  |
|                                                                                        |                                                                                                                      |                                                                                                                                                                                                                                                                                                                                                                                                                |   |      |  |  |  |  |  |  |
|                                                                                        |                                                                                                                      |                                                                                                                                                                                                                                                                                                                                                                                                                |   |      |  |  |  |  |  |  |
| <b>Please place an "X" next to the following statement to indicate your agreement:</b> |                                                                                                                      |                                                                                                                                                                                                                                                                                                                                                                                                                |   |      |  |  |  |  |  |  |
| X                                                                                      | I certify that I have answered every question and have not altered the wording of any of the questions on this form. |                                                                                                                                                                                                                                                                                                                                                                                                                |   |      |  |  |  |  |  |  |

## ICMJE DISCLOSURE FORM

|                                      |                                                                                                        |
|--------------------------------------|--------------------------------------------------------------------------------------------------------|
| <b>Date:</b>                         | 12.10.2021                                                                                             |
| <b>Your Name:</b>                    | Krithika Ramaprabhu                                                                                    |
| <b>Manuscript Title:</b>             | Long-term survival following postoperative myocardial infraction after coronary artery bypass surgery. |
| <b>Manuscript Number (if known):</b> | <b>JTD-21-1279-CL</b>                                                                                  |

In the interest of transparency, we ask you to disclose all relationships/activities/interests listed below that are related to the content of your manuscript. "Related" means any relation with for-profit or not-for-profit third parties whose interests may be affected by the content of the manuscript. Disclosure represents a commitment to transparency and does not necessarily indicate a bias. If you are in doubt about whether to list a relationship/activity/interest, it is preferable that you do so.

The author's relationships/activities/interests should be defined broadly. For example, if your manuscript pertains to the epidemiology of hypertension, you should declare all relationships with manufacturers of antihypertensive medication, even if that medication is not mentioned in the manuscript.

In item #1 below, report all support for the work reported in this manuscript without time limit. For all other items, the time frame for disclosure is the past 36 months.

|          | <b>Name all entities with whom you have this relationship or indicate none (add rows as needed)</b>                                                                            | <b>Specifications/Comments (e.g., if payments were made to you or to your institution)</b> |                                      |
|----------|--------------------------------------------------------------------------------------------------------------------------------------------------------------------------------|--------------------------------------------------------------------------------------------|--------------------------------------|
| <b>1</b> | All support for the present manuscript (e.g., funding, provision of study materials, medical writing, article processing charges, etc.)<br><b>No time limit for this item.</b> | <input checked="" type="checkbox"/> <b>X</b>                                               | <input type="checkbox"/> <b>None</b> |
|          |                                                                                                                                                                                |                                                                                            |                                      |
|          |                                                                                                                                                                                |                                                                                            |                                      |
|          |                                                                                                                                                                                |                                                                                            |                                      |
| <b>2</b> | Grants or contracts from any entity (if not indicated in item #1 above).                                                                                                       | <input type="checkbox"/> <b>X</b>                                                          | <input type="checkbox"/> <b>None</b> |
|          |                                                                                                                                                                                |                                                                                            |                                      |
|          |                                                                                                                                                                                |                                                                                            |                                      |
|          |                                                                                                                                                                                |                                                                                            |                                      |

|   |                                                                                                              |   |      |
|---|--------------------------------------------------------------------------------------------------------------|---|------|
| 3 | Royalties or licenses                                                                                        | X | None |
|   |                                                                                                              |   |      |
|   |                                                                                                              |   |      |
|   |                                                                                                              |   |      |
| 4 | Consulting fees                                                                                              | X | None |
|   |                                                                                                              |   |      |
|   |                                                                                                              |   |      |
|   |                                                                                                              |   |      |
| 5 | Payment or honoraria for lectures, presentations, speakers bureaus, manuscript writing or educational events | X | None |
|   |                                                                                                              |   |      |
|   |                                                                                                              |   |      |
|   |                                                                                                              |   |      |
| 6 | Payment for expert testimony                                                                                 | X | None |
|   |                                                                                                              |   |      |
|   |                                                                                                              |   |      |
|   |                                                                                                              |   |      |
| 7 | Support for attending meetings and/or travel                                                                 | X | None |
|   |                                                                                                              |   |      |
|   |                                                                                                              |   |      |
|   |                                                                                                              |   |      |
| 8 | Patents planned, issued or pending                                                                           | X | None |
|   |                                                                                                              |   |      |
|   |                                                                                                              |   |      |
|   |                                                                                                              |   |      |
| 9 | Participation on a Data Safety Monitoring Board or Advisory Board                                            | X | None |
|   |                                                                                                              |   |      |
|   |                                                                                                              |   |      |
|   |                                                                                                              |   |      |



|                                                                                        |                                                                                                                      |   |      |
|----------------------------------------------------------------------------------------|----------------------------------------------------------------------------------------------------------------------|---|------|
| 10                                                                                     | Leadership or fiduciary role in other board, society, committee or advocacy group, paid or unpaid                    | X | None |
|                                                                                        |                                                                                                                      |   |      |
|                                                                                        |                                                                                                                      |   |      |
|                                                                                        |                                                                                                                      |   |      |
| 11                                                                                     | Stock or stock options                                                                                               | X | None |
|                                                                                        |                                                                                                                      |   |      |
|                                                                                        |                                                                                                                      |   |      |
|                                                                                        |                                                                                                                      |   |      |
| 12                                                                                     | Receipt of equipment, materials, drugs, medical writing, gifts or other services                                     | X | None |
|                                                                                        |                                                                                                                      |   |      |
|                                                                                        |                                                                                                                      |   |      |
|                                                                                        |                                                                                                                      |   |      |
| 13                                                                                     | Other financial or non-financial interests                                                                           | X | None |
|                                                                                        |                                                                                                                      |   |      |
|                                                                                        |                                                                                                                      |   |      |
|                                                                                        |                                                                                                                      |   |      |
| <b>Please place an "X" next to the following statement to indicate your agreement:</b> |                                                                                                                      |   |      |
| X                                                                                      | I certify that I have answered every question and have not altered the wording of any of the questions on this form. |   |      |

## ICMJE DISCLOSURE FORM

|                                      |                                                                                                        |
|--------------------------------------|--------------------------------------------------------------------------------------------------------|
| <b>Date:</b>                         | 12.10.2021                                                                                             |
| <b>Your Name:</b>                    | Hubert Hymczak                                                                                         |
| <b>Manuscript Title:</b>             | Long-term survival following postoperative myocardial infraction after coronary artery bypass surgery. |
| <b>Manuscript Number (if known):</b> | <b>JTD-21-1279-CL</b>                                                                                  |

In the interest of transparency, we ask you to disclose all relationships/activities/interests listed below that are related to the content of your manuscript. "Related" means any relation with for-profit or not-for-profit third parties whose interests may be affected by the content of the manuscript. Disclosure represents a commitment to transparency and does not necessarily indicate a bias. If you are in doubt about whether to list a relationship/activity/interest, it is preferable that you do so.

The author's relationships/activities/interests should be defined broadly. For example, if your manuscript pertains to the epidemiology of hypertension, you should declare all relationships with manufacturers of antihypertensive medication, even if that medication is not mentioned in the manuscript.

In item #1 below, report all support for the work reported in this manuscript without time limit. For all other items, the time frame for disclosure is the past 36 months.

|          | <b>Name all entities with whom you have this relationship or indicate none (add rows as needed)</b>                                                                            | <b>Specifications/Comments (e.g., if payments were made to you or to your institution)</b> |                                      |
|----------|--------------------------------------------------------------------------------------------------------------------------------------------------------------------------------|--------------------------------------------------------------------------------------------|--------------------------------------|
| <b>1</b> | All support for the present manuscript (e.g., funding, provision of study materials, medical writing, article processing charges, etc.)<br><b>No time limit for this item.</b> | <input checked="" type="checkbox"/> <b>X</b>                                               | <input type="checkbox"/> <b>None</b> |
|          |                                                                                                                                                                                |                                                                                            |                                      |
|          |                                                                                                                                                                                |                                                                                            |                                      |
|          |                                                                                                                                                                                |                                                                                            |                                      |
| <b>2</b> | Grants or contracts from any entity (if not indicated in item #1 above).                                                                                                       | <input type="checkbox"/> <b>X</b>                                                          | <input type="checkbox"/> <b>None</b> |
|          |                                                                                                                                                                                |                                                                                            |                                      |
|          |                                                                                                                                                                                |                                                                                            |                                      |
|          |                                                                                                                                                                                |                                                                                            |                                      |

|   |                                                                                                              |   |      |
|---|--------------------------------------------------------------------------------------------------------------|---|------|
| 3 | Royalties or licenses                                                                                        | X | None |
|   |                                                                                                              |   |      |
|   |                                                                                                              |   |      |
|   |                                                                                                              |   |      |
| 4 | Consulting fees                                                                                              | X | None |
|   |                                                                                                              |   |      |
|   |                                                                                                              |   |      |
|   |                                                                                                              |   |      |
| 5 | Payment or honoraria for lectures, presentations, speakers bureaus, manuscript writing or educational events | X | None |
|   |                                                                                                              |   |      |
|   |                                                                                                              |   |      |
|   |                                                                                                              |   |      |
| 6 | Payment for expert testimony                                                                                 | X | None |
|   |                                                                                                              |   |      |
|   |                                                                                                              |   |      |
|   |                                                                                                              |   |      |
| 7 | Support for attending meetings and/or travel                                                                 | X | None |
|   |                                                                                                              |   |      |
|   |                                                                                                              |   |      |
|   |                                                                                                              |   |      |
| 8 | Patents planned, issued or pending                                                                           | X | None |
|   |                                                                                                              |   |      |
|   |                                                                                                              |   |      |
|   |                                                                                                              |   |      |
| 9 | Participation on a Data Safety Monitoring Board or Advisory Board                                            | X | None |
|   |                                                                                                              |   |      |
|   |                                                                                                              |   |      |
|   |                                                                                                              |   |      |

|                                                                                        |                                                                                                                      |   |      |
|----------------------------------------------------------------------------------------|----------------------------------------------------------------------------------------------------------------------|---|------|
| 10                                                                                     | Leadership or fiduciary role in other board, society, committee or advocacy group, paid or unpaid                    | X | None |
|                                                                                        |                                                                                                                      |   |      |
|                                                                                        |                                                                                                                      |   |      |
|                                                                                        |                                                                                                                      |   |      |
| 11                                                                                     | Stock or stock options                                                                                               | X | None |
|                                                                                        |                                                                                                                      |   |      |
|                                                                                        |                                                                                                                      |   |      |
|                                                                                        |                                                                                                                      |   |      |
| 12                                                                                     | Receipt of equipment, materials, drugs, medical writing, gifts or other services                                     | X | None |
|                                                                                        |                                                                                                                      |   |      |
|                                                                                        |                                                                                                                      |   |      |
|                                                                                        |                                                                                                                      |   |      |
| 13                                                                                     | Other financial or non-financial interests                                                                           | X | None |
|                                                                                        |                                                                                                                      |   |      |
|                                                                                        |                                                                                                                      |   |      |
|                                                                                        |                                                                                                                      |   |      |
| <b>Please place an "X" next to the following statement to indicate your agreement:</b> |                                                                                                                      |   |      |
| X                                                                                      | I certify that I have answered every question and have not altered the wording of any of the questions on this form. |   |      |

## ICMJE DISCLOSURE FORM

|                                                                                                                                                                                                                                                                                                                                                                                                                                                                                                                                                                                                                                                                                                                                                                                                                                                                                                                                                                                                                                        |                                                                                                        |
|----------------------------------------------------------------------------------------------------------------------------------------------------------------------------------------------------------------------------------------------------------------------------------------------------------------------------------------------------------------------------------------------------------------------------------------------------------------------------------------------------------------------------------------------------------------------------------------------------------------------------------------------------------------------------------------------------------------------------------------------------------------------------------------------------------------------------------------------------------------------------------------------------------------------------------------------------------------------------------------------------------------------------------------|--------------------------------------------------------------------------------------------------------|
| <b>Date:</b>                                                                                                                                                                                                                                                                                                                                                                                                                                                                                                                                                                                                                                                                                                                                                                                                                                                                                                                                                                                                                           | 12.10.2021                                                                                             |
| <b>Your Name:</b>                                                                                                                                                                                                                                                                                                                                                                                                                                                                                                                                                                                                                                                                                                                                                                                                                                                                                                                                                                                                                      | Bogusław Kapelak                                                                                       |
| <b>Manuscript Title:</b>                                                                                                                                                                                                                                                                                                                                                                                                                                                                                                                                                                                                                                                                                                                                                                                                                                                                                                                                                                                                               | Long-term survival following postoperative myocardial infraction after coronary artery bypass surgery. |
| <b>Manuscript Number (if known):</b>                                                                                                                                                                                                                                                                                                                                                                                                                                                                                                                                                                                                                                                                                                                                                                                                                                                                                                                                                                                                   | <b>JTD-21-1279-CL</b>                                                                                  |
| <p>In the interest of transparency, we ask you to disclose all relationships/activities/interests listed below that are related to the content of your manuscript. "Related" means any relation with for-profit or not-for-profit third parties whose interests may be affected by the content of the manuscript. Disclosure represents a commitment to transparency and does not necessarily indicate a bias. If you are in doubt about whether to list a relationship/activity/interest, it is preferable that you do so.</p> <p>The author's relationships/activities/interests should be defined broadly. For example, if your manuscript pertains to the epidemiology of hypertension, you should declare all relationships with manufacturers of antihypertensive medication, even if that medication is not mentioned in the manuscript.</p> <p>In item #1 below, report all support for the work reported in this manuscript without time limit. For all other items, the time frame for disclosure is the past 36 months.</p> |                                                                                                        |

|          | <b>Name all entities with whom you have this relationship or indicate none (add rows as needed)</b>                                                                            | <b>Specifications/Comments (e.g., if payments were made to you or to your institution)</b> |                               |
|----------|--------------------------------------------------------------------------------------------------------------------------------------------------------------------------------|--------------------------------------------------------------------------------------------|-------------------------------|
| <b>1</b> | All support for the present manuscript (e.g., funding, provision of study materials, medical writing, article processing charges, etc.)<br><b>No time limit for this item.</b> | <input checked="" type="checkbox"/>                                                        | <input type="checkbox"/> None |
|          |                                                                                                                                                                                | <input type="checkbox"/>                                                                   | <input type="checkbox"/>      |
|          |                                                                                                                                                                                | <input type="checkbox"/>                                                                   | <input type="checkbox"/>      |
|          |                                                                                                                                                                                | <input type="checkbox"/>                                                                   | <input type="checkbox"/>      |
| <b>2</b> | Grants or contracts from any entity (if not indicated in item #1 above).                                                                                                       | <input checked="" type="checkbox"/>                                                        | <input type="checkbox"/> None |
|          |                                                                                                                                                                                | <input type="checkbox"/>                                                                   | <input type="checkbox"/>      |
|          |                                                                                                                                                                                | <input type="checkbox"/>                                                                   | <input type="checkbox"/>      |
|          |                                                                                                                                                                                | <input type="checkbox"/>                                                                   | <input type="checkbox"/>      |

|   |                                                                                                              |   |      |
|---|--------------------------------------------------------------------------------------------------------------|---|------|
| 3 | Royalties or licenses                                                                                        | X | None |
|   |                                                                                                              |   |      |
|   |                                                                                                              |   |      |
|   |                                                                                                              |   |      |
| 4 | Consulting fees                                                                                              | X | None |
|   |                                                                                                              |   |      |
|   |                                                                                                              |   |      |
|   |                                                                                                              |   |      |
| 5 | Payment or honoraria for lectures, presentations, speakers bureaus, manuscript writing or educational events | X | None |
|   |                                                                                                              |   |      |
|   |                                                                                                              |   |      |
|   |                                                                                                              |   |      |
| 6 | Payment for expert testimony                                                                                 | X | None |
|   |                                                                                                              |   |      |
|   |                                                                                                              |   |      |
|   |                                                                                                              |   |      |
| 7 | Support for attending meetings and/or travel                                                                 | X | None |
|   |                                                                                                              |   |      |
|   |                                                                                                              |   |      |
|   |                                                                                                              |   |      |
| 8 | Patents planned, issued or pending                                                                           | X | None |
|   |                                                                                                              |   |      |
|   |                                                                                                              |   |      |
|   |                                                                                                              |   |      |
| 9 | Participation on a Data Safety Monitoring Board or Advisory Board                                            | X | None |
|   |                                                                                                              |   |      |
|   |                                                                                                              |   |      |
|   |                                                                                                              |   |      |

|                                                                                        |                                                                                                                      |   |      |
|----------------------------------------------------------------------------------------|----------------------------------------------------------------------------------------------------------------------|---|------|
| 10                                                                                     | Leadership or fiduciary role in other board, society, committee or advocacy group, paid or unpaid                    | X | None |
|                                                                                        |                                                                                                                      |   |      |
|                                                                                        |                                                                                                                      |   |      |
|                                                                                        |                                                                                                                      |   |      |
| 11                                                                                     | Stock or stock options                                                                                               | X | None |
|                                                                                        |                                                                                                                      |   |      |
|                                                                                        |                                                                                                                      |   |      |
|                                                                                        |                                                                                                                      |   |      |
| 12                                                                                     | Receipt of equipment, materials, drugs, medical writing, gifts or other services                                     | X | None |
|                                                                                        |                                                                                                                      |   |      |
|                                                                                        |                                                                                                                      |   |      |
|                                                                                        |                                                                                                                      |   |      |
| 13                                                                                     | Other financial or non-financial interests                                                                           | X | None |
|                                                                                        |                                                                                                                      |   |      |
|                                                                                        |                                                                                                                      |   |      |
|                                                                                        |                                                                                                                      |   |      |
| <b>Please place an "X" next to the following statement to indicate your agreement:</b> |                                                                                                                      |   |      |
| X                                                                                      | I certify that I have answered every question and have not altered the wording of any of the questions on this form. |   |      |

## ICMJE DISCLOSURE FORM

|                                      |                                                                                                        |
|--------------------------------------|--------------------------------------------------------------------------------------------------------|
| <b>Date:</b>                         | 12.10.2021                                                                                             |
| <b>Your Name:</b>                    | Anna Kędziora                                                                                          |
| <b>Manuscript Title:</b>             | Long-term survival following postoperative myocardial infraction after coronary artery bypass surgery. |
| <b>Manuscript Number (if known):</b> | <b>JTD-21-1279-CL</b>                                                                                  |

In the interest of transparency, we ask you to disclose all relationships/activities/interests listed below that are related to the content of your manuscript. "Related" means any relation with for-profit or not-for-profit third parties whose interests may be affected by the content of the manuscript. Disclosure represents a commitment to transparency and does not necessarily indicate a bias. If you are in doubt about whether to list a relationship/activity/interest, it is preferable that you do so.

The author's relationships/activities/interests should be defined broadly. For example, if your manuscript pertains to the epidemiology of hypertension, you should declare all relationships with manufacturers of antihypertensive medication, even if that medication is not mentioned in the manuscript.

In item #1 below, report all support for the work reported in this manuscript without time limit. For all other items, the time frame for disclosure is the past 36 months.

|          | <b>Name all entities with whom you have this relationship or indicate none (add rows as needed)</b>                                                                            | <b>Specifications/Comments (e.g., if payments were made to you or to your institution)</b> |                               |
|----------|--------------------------------------------------------------------------------------------------------------------------------------------------------------------------------|--------------------------------------------------------------------------------------------|-------------------------------|
| <b>1</b> | All support for the present manuscript (e.g., funding, provision of study materials, medical writing, article processing charges, etc.)<br><b>No time limit for this item.</b> | <input checked="" type="checkbox"/>                                                        | <input type="checkbox"/> None |
|          |                                                                                                                                                                                | <input type="checkbox"/>                                                                   | <input type="checkbox"/>      |
|          |                                                                                                                                                                                | <input type="checkbox"/>                                                                   | <input type="checkbox"/>      |
|          |                                                                                                                                                                                | <input type="checkbox"/>                                                                   | <input type="checkbox"/>      |
| <b>2</b> | Grants or contracts from any entity (if not indicated in item #1 above).                                                                                                       | <input checked="" type="checkbox"/>                                                        | <input type="checkbox"/> None |
|          |                                                                                                                                                                                | <input type="checkbox"/>                                                                   | <input type="checkbox"/>      |
|          |                                                                                                                                                                                | <input type="checkbox"/>                                                                   | <input type="checkbox"/>      |
|          |                                                                                                                                                                                | <input type="checkbox"/>                                                                   | <input type="checkbox"/>      |



|   |                                                                                                              |   |      |
|---|--------------------------------------------------------------------------------------------------------------|---|------|
| 3 | Royalties or licenses                                                                                        | X | None |
|   |                                                                                                              |   |      |
|   |                                                                                                              |   |      |
|   |                                                                                                              |   |      |
| 4 | Consulting fees                                                                                              | X | None |
|   |                                                                                                              |   |      |
|   |                                                                                                              |   |      |
|   |                                                                                                              |   |      |
| 5 | Payment or honoraria for lectures, presentations, speakers bureaus, manuscript writing or educational events | X | None |
|   |                                                                                                              |   |      |
|   |                                                                                                              |   |      |
|   |                                                                                                              |   |      |
| 6 | Payment for expert testimony                                                                                 | X | None |
|   |                                                                                                              |   |      |
|   |                                                                                                              |   |      |
|   |                                                                                                              |   |      |
| 7 | Support for attending meetings and/or travel                                                                 | X | None |
|   |                                                                                                              |   |      |
|   |                                                                                                              |   |      |
|   |                                                                                                              |   |      |
| 8 | Patents planned, issued or pending                                                                           | X | None |
|   |                                                                                                              |   |      |
|   |                                                                                                              |   |      |
|   |                                                                                                              |   |      |
| 9 | Participation on a Data Safety Monitoring Board or Advisory Board                                            | X | None |
|   |                                                                                                              |   |      |
|   |                                                                                                              |   |      |
|   |                                                                                                              |   |      |

|                                                                                        |                                                                                                                      |                                                                                                                                                                                                                                                                                                                                                                                                                |   |      |  |  |  |  |  |  |
|----------------------------------------------------------------------------------------|----------------------------------------------------------------------------------------------------------------------|----------------------------------------------------------------------------------------------------------------------------------------------------------------------------------------------------------------------------------------------------------------------------------------------------------------------------------------------------------------------------------------------------------------|---|------|--|--|--|--|--|--|
| 10                                                                                     | Leadership or fiduciary role in other board, society, committee or advocacy group, paid or unpaid                    | <table border="1"> <tr> <td data-bbox="1000 195 1179 226">X</td> <td data-bbox="1179 195 1343 226">None</td> </tr> <tr> <td data-bbox="1000 264 1179 296"></td> <td data-bbox="1179 264 1343 296"></td> </tr> <tr> <td data-bbox="1000 296 1179 327"></td> <td data-bbox="1179 296 1343 327"></td> </tr> <tr> <td data-bbox="1000 327 1179 359"></td> <td data-bbox="1179 327 1343 359"></td> </tr> </table>   | X | None |  |  |  |  |  |  |
| X                                                                                      | None                                                                                                                 |                                                                                                                                                                                                                                                                                                                                                                                                                |   |      |  |  |  |  |  |  |
|                                                                                        |                                                                                                                      |                                                                                                                                                                                                                                                                                                                                                                                                                |   |      |  |  |  |  |  |  |
|                                                                                        |                                                                                                                      |                                                                                                                                                                                                                                                                                                                                                                                                                |   |      |  |  |  |  |  |  |
|                                                                                        |                                                                                                                      |                                                                                                                                                                                                                                                                                                                                                                                                                |   |      |  |  |  |  |  |  |
| 11                                                                                     | Stock or stock options                                                                                               | <table border="1"> <tr> <td data-bbox="1000 407 1179 438">X</td> <td data-bbox="1179 407 1343 438">None</td> </tr> <tr> <td data-bbox="1000 476 1179 508"></td> <td data-bbox="1179 476 1343 508"></td> </tr> <tr> <td data-bbox="1000 508 1179 539"></td> <td data-bbox="1179 508 1343 539"></td> </tr> <tr> <td data-bbox="1000 539 1179 571"></td> <td data-bbox="1179 539 1343 571"></td> </tr> </table>   | X | None |  |  |  |  |  |  |
| X                                                                                      | None                                                                                                                 |                                                                                                                                                                                                                                                                                                                                                                                                                |   |      |  |  |  |  |  |  |
|                                                                                        |                                                                                                                      |                                                                                                                                                                                                                                                                                                                                                                                                                |   |      |  |  |  |  |  |  |
|                                                                                        |                                                                                                                      |                                                                                                                                                                                                                                                                                                                                                                                                                |   |      |  |  |  |  |  |  |
|                                                                                        |                                                                                                                      |                                                                                                                                                                                                                                                                                                                                                                                                                |   |      |  |  |  |  |  |  |
| 12                                                                                     | Receipt of equipment, materials, drugs, medical writing, gifts or other services                                     | <table border="1"> <tr> <td data-bbox="1000 625 1179 657">X</td> <td data-bbox="1179 625 1343 657">None</td> </tr> <tr> <td data-bbox="1000 695 1179 726"></td> <td data-bbox="1179 695 1343 726"></td> </tr> <tr> <td data-bbox="1000 726 1179 758"></td> <td data-bbox="1179 726 1343 758"></td> </tr> <tr> <td data-bbox="1000 758 1179 789"></td> <td data-bbox="1179 758 1343 789"></td> </tr> </table>   | X | None |  |  |  |  |  |  |
| X                                                                                      | None                                                                                                                 |                                                                                                                                                                                                                                                                                                                                                                                                                |   |      |  |  |  |  |  |  |
|                                                                                        |                                                                                                                      |                                                                                                                                                                                                                                                                                                                                                                                                                |   |      |  |  |  |  |  |  |
|                                                                                        |                                                                                                                      |                                                                                                                                                                                                                                                                                                                                                                                                                |   |      |  |  |  |  |  |  |
|                                                                                        |                                                                                                                      |                                                                                                                                                                                                                                                                                                                                                                                                                |   |      |  |  |  |  |  |  |
| 13                                                                                     | Other financial or non-financial interests                                                                           | <table border="1"> <tr> <td data-bbox="1000 844 1179 875">X</td> <td data-bbox="1179 844 1343 875">None</td> </tr> <tr> <td data-bbox="1000 913 1179 945"></td> <td data-bbox="1179 913 1343 945"></td> </tr> <tr> <td data-bbox="1000 945 1179 976"></td> <td data-bbox="1179 945 1343 976"></td> </tr> <tr> <td data-bbox="1000 976 1179 1008"></td> <td data-bbox="1179 976 1343 1008"></td> </tr> </table> | X | None |  |  |  |  |  |  |
| X                                                                                      | None                                                                                                                 |                                                                                                                                                                                                                                                                                                                                                                                                                |   |      |  |  |  |  |  |  |
|                                                                                        |                                                                                                                      |                                                                                                                                                                                                                                                                                                                                                                                                                |   |      |  |  |  |  |  |  |
|                                                                                        |                                                                                                                      |                                                                                                                                                                                                                                                                                                                                                                                                                |   |      |  |  |  |  |  |  |
|                                                                                        |                                                                                                                      |                                                                                                                                                                                                                                                                                                                                                                                                                |   |      |  |  |  |  |  |  |
| <b>Please place an "X" next to the following statement to indicate your agreement:</b> |                                                                                                                      |                                                                                                                                                                                                                                                                                                                                                                                                                |   |      |  |  |  |  |  |  |
| X                                                                                      | I certify that I have answered every question and have not altered the wording of any of the questions on this form. |                                                                                                                                                                                                                                                                                                                                                                                                                |   |      |  |  |  |  |  |  |
