# Supplementary material for: Long-term survival following postoperative myocardial infraction after coronary artery bypass surgery
Source: PubMed Central journal article supplement — J Thorac Dis. 2022 Jan;14(1):102–12. doi: 10.21037/jtd-21-1279 (PMC8828518; doi:10.21037/jtd-21-1279), 2022-01
Supplement: jtd-14-01-102-dss.pdf [file jtd-14-01-102-dss.pdf]

## Data Sharing Statement

|                     |                                                                                               |                                                                                                                                                                                                                                                                                                                                                                                                                                                                                                                                                                                                                                                                                                                                                                                                                                                          |
|---------------------|-----------------------------------------------------------------------------------------------|----------------------------------------------------------------------------------------------------------------------------------------------------------------------------------------------------------------------------------------------------------------------------------------------------------------------------------------------------------------------------------------------------------------------------------------------------------------------------------------------------------------------------------------------------------------------------------------------------------------------------------------------------------------------------------------------------------------------------------------------------------------------------------------------------------------------------------------------------------|
| <b>Article Info</b> | <a href="https://dx.doi.org/10.21037/jtd-21-1279">https://dx.doi.org/10.21037/jtd-21-1279</a> |                                                                                                                                                                                                                                                                                                                                                                                                                                                                                                                                                                                                                                                                                                                                                                                                                                                          |
| <b>Item</b>         | <b>Question</b>                                                                               | <b>Authors' Response<br/>(place "-" if not applicable)</b>                                                                                                                                                                                                                                                                                                                                                                                                                                                                                                                                                                                                                                                                                                                                                                                               |
| 1                   | Would you like to share data collected for your study to others?                              | No                                                                                                                                                                                                                                                                                                                                                                                                                                                                                                                                                                                                                                                                                                                                                                                                                                                       |
| 2                   | If not, would you like to share the reason for your decision?                                 | <p>Data was collected retrospectively from the KROK registry (Polish National Registry from Cardiac Surgery Procedures) (available at <a href="http://www.krok.csioz.gov.pl">www.krok.csioz.gov.pl</a>). The registry is an ongoing, nationwide, multi-institutional registry for all general cardiac surgery in Poland that collects in-hospital data on patients and outcomes; details of the registry design have been described in other papers. Long-term survival data are transmitted directly to the registry from follow-up mortality data obtained from National Health Fund - the nationwide, mandatory, public health insurance institution in Poland - and included in the registry.</p> <p>The database contains sensitive data, not intended for publication, such as name, surname, age, address. Data in accordance with applicable</p> |

|    |                                                                                                                                                    |                                                            |
|----|----------------------------------------------------------------------------------------------------------------------------------------------------|------------------------------------------------------------|
|    |                                                                                                                                                    | regulations in the European Union and the GDPR obligation. |
| 3  | What data in particular will be shared?                                                                                                            | No                                                         |
| 4  | Any other documents will be share? Such as study protocol, statistical analysis plan, informed consent form, clinical study report, analytic code. | No                                                         |
| 5  | When will data availability begin?                                                                                                                 | No                                                         |
| 6  | When will data availability end?                                                                                                                   | No                                                         |
| 7  | To whom will you share the data?                                                                                                                   | No                                                         |
| 8  | For what type of analysis or purpose?                                                                                                              | No                                                         |
| 9  | How or where can the data/documents be obtained?                                                                                                   | No                                                         |
| 10 | Any other restrictions?                                                                                                                            | No                                                         |
