# Supplementary material for: Long-term survival following postoperative myocardial infraction after coronary artery bypass surgery
Source: PubMed Central journal article supplement — J Thorac Dis. 2022 Jan;14(1):102–12. doi: 10.21037/jtd-21-1279 (PMC8828518; doi:10.21037/jtd-21-1279), 2022-01
Supplement: jtd-14-01-102-supplementary.pdf [file jtd-14-01-102-supplementary.pdf]

## Supplementary

**Table S1** Univariate Cox regression analysis results for death within 1 year from CABG

| Parameters                            | HR    | 95% CI      | p     |
|---------------------------------------|-------|-------------|-------|
| Postoperative MI                      | 2.249 | 1.430–3.538 | 0.000 |
| Age (years)                           | 1.066 | 1.052–1.081 | 0.000 |
| Gender (female vs. male)              | 1.183 | 0.915–1.529 | 0.199 |
| LVEF (%)                              | 0.963 | 0.954–0.971 | 0.000 |
| Non-elective procedure                | 2.657 | 2.110–3.346 | 0.000 |
| Incomplete revascularization          | 1.372 | 1.089–1.728 | 0.007 |
| EuroSCORE II                          | 1.067 | 1.058–1.076 | 0.000 |
| Preoperative creatinine level (mg/dL) | 1.000 | 0.997–1.003 | 0.852 |
| No of diseased vessels                | 0.946 | 0.828–1.081 | 0.416 |
| Left main stenosis                    | 1.206 | 0.963–1.511 | 0.102 |

**Table S2** Univariate Cox regression analysis results for death within 5 years from CABG

| Parameters                            | HR    | 95% CI      | P     |
|---------------------------------------|-------|-------------|-------|
| Postoperative MI                      | 1.476 | 1.041–2.091 | 0.029 |
| Age (years)                           | 1.058 | 1.049–1.067 | 0.000 |
| Gender (female vs. Male)              | 0.925 | 0.779–1.097 | 0.368 |
| LVEF (%)                              | 0.968 | 0.963–0.974 | 0.000 |
| Diabetes                              | 1.358 | 1.178–1.564 | 0.000 |
| Incomplete revascularization          | 1.287 | 1.113–1.489 | 0.001 |
| EuroSCORE II                          | 1.058 | 1.050–1.057 | 0.000 |
| Non-elective procedure                | 1.615 | 1.377–1.894 | 0.000 |
| ACS                                   | 1.532 | 1.317–1.782 | 0.000 |
| Preoperative creatinine level (mg/dL) | 1.000 | 0.997–1.002 | 0.766 |

**Table S3** Logistic regression for inverse probability treatment weighted

| Predictor                             | P     | OR    | OR 95% CI   |
|---------------------------------------|-------|-------|-------------|
| Age (years)                           | 0.657 | 0.995 | 0.976–1.016 |
| Male sex                              | 0.056 | 0.680 | 0.458–1.009 |
| Diabetes                              | 0.818 | 1.044 | 0.723–1.509 |
| Preoperative creatinine level (mg/dL) | 0.937 | 0.999 | 0.986–1.013 |
| ACS                                   | 0.120 | 1.390 | 0.918–2.104 |
| LVEF (%)                              | 0.895 | 0.999 | 0.984–1.014 |
| Elective surgery                      | 0.134 | 0.713 | 0.458–1.110 |
| EuroSCORE II                          | 0.987 | 1.000 | 0.961–1.042 |

Hosmer Lemeshow test:  $\chi^2=10.454$ ,  $df=8$ ;  $P=0.235$ .

**Table S4** General estimating equations for adjusted OR for impact of PMI on following end-points

| Parameter             | B      | Standard Error | 95% Wald CI |        | Hypothesis test |    |       | Exp(B) | 95% Wald CI for Exp (B) |       |
|-----------------------|--------|----------------|-------------|--------|-----------------|----|-------|--------|-------------------------|-------|
|                       |        |                | Lower       | Upper  | Wald Chi-square | df | Sig   |        | Lower                   | Upper |
| In-hospital mortality |        |                |             |        |                 |    |       |        |                         |       |
| Intercept             | -3.417 | 0.0902         | -3.594      | -3.240 | 1,435.597       | 1  | 0.000 | 0.033  | 0.028                   | 0.039 |
| PMI                   | 0.577  | 0.3886         | -0.184      | 1.339  | 2.207           | 1  | 0.137 | 1.781  | 0.832                   | 3.815 |
| 30-day mortality      |        |                |             |        |                 |    |       |        |                         |       |
| Intercept             | -3.316 | 0.0860         | -3.485      | -3.148 | 1,485.912       | 1  | 0.000 | 0.036  | 0.031                   | 0.043 |
| PMI                   | 0.199  | 0.4422         | -0.667      | 1.066  | 0.203           | 1  | 0.652 | 1.221  | 0.513                   | 2.904 |
| 1-year mortality      |        |                |             |        |                 |    |       |        |                         |       |
| Intercept             | -2.677 | 0.0644         | -2.803      | -2.551 | 1,730.088       | 1  | 0.000 | 0.069  | 0.061                   | 0.078 |
| PMI                   | 0.956  | 0.2600         | 0.447       | 1.466  | 13.523          | 1  | 0.000 | 2.602  | 1.563                   | 4.331 |
| 5 years mortality     |        |                |             |        |                 |    |       |        |                         |       |
| Intercept             | -1.594 | .0421          | -1.676      | -1.511 | 1433.278        | 1  | 0.000 | 0.203  | 0.187                   | 0.221 |
| PMI                   | 0.413  | 0.2174         | -0.013      | 0.839  | 3.612           | 1  | 0.057 | 1.512  | 0.987                   | 2.314 |
